# Supplementary material
Source: publisher figshare collection journal article supplement (https://plos.figshare.com/articles/dataset/_/142505)
Supplement: Supplementary file [file 1]

| Gene   | Description                                                                                                                                                                      | pI   | Mr (kDa) | Score  | Sequence coverage (%) | Number of peptides | Experimental setup used for identification |
|--------|----------------------------------------------------------------------------------------------------------------------------------------------------------------------------------|------|----------|--------|-----------------------|--------------------|--------------------------------------------|
| PF#33  | Protein of unknown function 5.2 Protein of unknown function similar to proteins from other organisms                                                                             | 5,3  | 33,5     | 217,8  | 17,5                  | 4                  | b                                          |
| PF#40  | iolB iolB (Myo-inositol catabolism IolB protein) 2.1.1 Specific carbohydrate metabolic pathway                                                                                   | 4,8  | 31,9     | 133,7  | 8,3                   | 2                  | b                                          |
| PF#42  | Protein of unknown function 5.2 Protein of unknown function similar to proteins from other organisms                                                                             | 4,7  | 23,2     | 1123,4 | 81,7                  | 20                 | a, b, c                                    |
| PF#43  | rpiB1 Ribose-5-phosphate isomerase 1 2.1.2 Main glycolytic pathways                                                                                                              | 5,6  | 15,4     | 51,2   | 8,8                   | 1                  | b                                          |
| PF#46  | acpP Acyl carrier protein (ACP) 2.4 Metabolism of lipids                                                                                                                         | 4,1  | 9,2      | 178,0  | 48,2                  | 3                  | c                                          |
| PF#47  | PF47 Protein mrp homolog (ATP-binding protein) 4.1 Adaptation to atypical conditions                                                                                             | 4,7  | 40,3     | 528,2  | 36,6                  | 7                  | b, c                                       |
| PF#51  | rpmD 50S ribosomal protein L30 3.7.1 Ribosomal proteins                                                                                                                          | 10,4 | 6,7      | 166,0  | 55,0                  | 3                  | a, c                                       |
| PF#52  | rplO 50S ribosomal protein L15 3.7.1 Ribosomal proteins                                                                                                                          | 10,3 | 15,5     | 216,3  | 29,9                  | 4                  | c                                          |
| PF#57  | pmm Phosphomannomutase (PMM) 2.1.1 Specific carbohydrate metabolic pathway                                                                                                       | 5,2  | 29,2     | 51,7   | 4,1                   | 1                  | b                                          |
| PF#61  | pip2 Proline iminopeptidase 3.10 Protein degradation                                                                                                                             | 5,3  | 39,0     | 226,4  | 15,3                  | 5                  | b                                          |
| PF#70  | rbfA Ribosome-binding factor A 3.6 RNA modification                                                                                                                              | 4,8  | 16,3     | 65,2   | 13,7                  | 2                  | b                                          |
| PF#77  | manA Phosphomannose isomerase 2.1.1 Specific carbohydrate metabolic pathway                                                                                                      | 5,1  | 42,9     | 47,3   | 2,8                   | 1                  | b                                          |
| PF#79  | sdhB Succinate dehydrogenase, subunit B 1.4 Membrane bioenergetics (electron transport chain and ATP synthase)                                                                   | 5,4  | 27,3     | 199,0  | 21,8                  | 3                  | a, b, c                                    |
| PF#87  | pptE phosphoenolpyruvate-protein phosphoryltransferase PptE                                                                                                                      | 5,0  | 51,8     | 312,5  | 16,6                  | 4                  | b                                          |
| PF#95  | rmlA (rfbA) Glucose-1-phosphate thymidyltransferase 2.1.1 Specific carbohydrate metabolic pathway                                                                                | 4,9  | 31,1     | 51,5   | 2,8                   | 1                  | b, c                                       |
| PF#101 | S-layer domain protein domain protein precursor 1.1 Cell wall                                                                                                                    | 6,6  | 30,4     | 186,4  | 6,4                   | 4                  | a, b                                       |
| PF#107 | sufD FeS assembly protein SufD 1.2 Transport/binding proteins and lipoproteins                                                                                                   | 5,1  | 44,2     | 572,6  | 29,9                  | 7                  | a, b, c                                    |
| PF#109 | sufC ABC-type transport system involved in Fe-S cluster assembly, ATPase component, SufC 1.2 Transport/binding proteins and lipoproteins                                         | 5,2  | 26,9     | 373,2  | 34,9                  | 6                  | b, c                                       |
| PF#115 | Uridine phosphorylase 2.3 Metabolism of nucleotides and nucleic acids                                                                                                            | 4,8  | 28,3     | 76,7   | 7,8                   | 2                  | b                                          |
| PF#135 | cspA Cold shock-like protein CspA  4.1 Adaptation to atypical conditions                                                                                                         | 4,8  | 7,4      | 189,5  | 54,4                  | 3                  | a, b, c                                    |
| PF#137 | none Protein of unknown function 5.2 Protein of unknown function similar to proteins from other organisms                                                                        | 4,7  | 8,1      | 120,4  | 36,5                  | 2                  | c                                          |
| PF#146 | ll                                                                                                                                                                               | 5,0  | 32,9     | 1482,8 | 71,6                  | 24                 | a                                          |
| PF#147 | murD UDP-N-acetylmuramoylalanine--D-glutamate ligase (UDP-N- acetylmuramoyl-L-alanyl-D-glutamate synthetase) (D-glutamic acid- adding enzyme) 1.1 Cell wall                      | 5,5  | 52,5     | 875,7  | 40,5                  | 16                 | a                                          |
| PF#148 | gcvT Glycine cleavage system T protein, (aminomethyltransferase) 2.2 Metabolism of amino acids and related molecules                                                             | 5,5  | 41,1     | 360,9  | 23,6                  | 7                  | a, b                                       |
| PF#158 | rplJ 50S ribosomal protein L10 3.7.1 Ribosomal proteins                                                                                                                          | 4,5  | 21,9     | 553,5  | 62,3                  | 9                  | b, c                                       |
| PF#159 | rplL 50S ribosomal protein L7/L12 3.7.1 Ribosomal proteins                                                                                                                       | 4,5  | 13,7     | 303,6  | 63,4                  | 5                  | a, b, c                                    |
| PF#163 | Protein of unknown function 5.2 Protein of unknown function similar to proteins from other organisms                                                                             | 5,3  | 27,8     | 118,0  | 18,4                  | 3                  | b                                          |
| PF#167 | ahpC Alkyl hydroperoxide reductase subunit C (Peroxiredoxin) (Thioredoxin peroxidase) (Alkyl hydroperoxide reductase protein C22) (General stress protein 22) 4.2 Detoxification | 4,6  | 20,7     | 334,5  | 33,2                  | 5                  | b, c                                       |
| PF#169 | pf169 Carboxylic ester hydrolase 2.4 Metabolism of lipids                                                                                                                        | 5,3  | 24,9     | 290,4  | 41,8                  | 5                  | b                                          |
| PF#174 | metF 5,10-methylenetetrahydrofolate reductase 2.2 Metabolism of amino acids and related molecules                                                                                | 5,6  | 34,1     | 111,3  | 8,3                   | 2                  | b                                          |
| PF#179 | cbiL CbiL Precorrin-2 C20-methyltransferase 2.5 Metabolism of coenzymes and prosthetic groups                                                                                    | 4,9  | 26,9     | 189,8  | 18,7                  | 4                  | b                                          |

|        |                                                                                                                                                                                                            |      |       |        |      |    |         |
|--------|------------------------------------------------------------------------------------------------------------------------------------------------------------------------------------------------------------|------|-------|--------|------|----|---------|
| PF#180 | cbiF CbiF Precorrin-4 C11-methyltransferase 2.5 Metabolism of coenzymes and prosthetic groups                                                                                                              | 5,1  | 33,9  | 158,7  | 12,5 | 3  | a       |
| PF#183 | PPA1366 Putative 2-hydroxyhepta-2,4-diene-1,7-dioate isomerase                                                                                                                                             | 4,6  | 29,6  | 240,1  | 15,7 | 4  | b       |
| PF#186 | none Chlorite dismutase 4.2 Detoxification                                                                                                                                                                 | 5,5  | 25,7  | 332,1  | 34,5 | 6  | b       |
| PF#190 | inlA internalin protein 1.1 Cell wall                                                                                                                                                                      | 5,2  | 61,1  | 3759,4 | 73,8 | 60 | a, b    |
| PF#195 | hsp20 2 Heat shock protein 20 2 (20 kDa chaperone 2) 3.9 Protein folding                                                                                                                                   | 4,9  | 16,8  | 452,7  | 49,3 | 8  | b, c    |
| PF#198 | none Protein of unknown function 5.2 Protein of unknown function similar to proteins from other organisms                                                                                                  | 5,2  | 13,8  | 81,9   | 24,2 | 2  | b       |
| PF#202 | rpmE 50S ribosomal protein L31 3.7.1 Ribosomal proteins                                                                                                                                                    | 9,2  | 8,2   | 49,5   | 14,9 | 1  | c       |
| PF#213 | eno1 Enolase 1  2.1.2 Main glycolytic pathways                                                                                                                                                             | 4,5  | 45,9  | 1088,1 | 50,1 | 14 | a, b, c |
| PF#219 | slh S-layer protein precursor 1.1 Cell wall                                                                                                                                                                | 4,5  | 48,4  | 78,0   | 3,5  | 2  | a       |
| PF#241 | none Peptidase M23B family / metalloendopeptidase 1 Cell envelope and cellular processes                                                                                                                   | 5,3  | 39,0  | 1064,0 | 58,4 | 14 | a, b    |
| PF#243 | ppiA (cypB) Probable peptidyl-prolyl cis-trans isomerase A 3.9 Protein folding                                                                                                                             | 4,8  | 18,8  | 331,0  | 51,8 | 6  | b, c    |
| PF#244 | none Protein of unknown function 5.2 Protein of unknown function similar to proteins from other organisms                                                                                                  | 5,3  | 35,9  | 149,3  | 10,7 | 3  | b, c    |
| PF#252 | aspA Aspartate ammonia-lyase 2.2 Metabolism of amino acids and related molecules                                                                                                                           | 5,1  | 53,1  | 306,7  | 12,9 | 5  | b, c    |
| PF#264 | impA Inositol-1-monophosphatase (IMPase) (Inositol-1- phosphatase) (I-1-Pase) 2.1 Metabolism of carbohydrates and related molecules                                                                        | 5,4  | 30,4  | 54,4   | 2,8  | 1  | b       |
| PF#277 | murE UDP-N-acetylmuramoylalanyl-D-glutamate--2,6-diaminopimelate ligase (UDP-N-acetylmuramyl-tripeptide synthetase) (Meso- diaminopimelate-adding enzyme) (UDP-MurNAC-tripeptide synthetase) 1.1 Cell wall | 5,3  | 55,4  | 136,2  | 10,4 | 3  | b       |
| PF#279 | pf279 Carboxylic ester hydrolase 2.4 Metabolism of lipids                                                                                                                                                  | 5,4  | 46,4  | 1203,6 | 58,9 | 15 | a, b    |
| PF#286 | dps Starvation-inducible DNA-binding protein  4.1 Adaptation to atypical conditions                                                                                                                        | 4,7  | 19,1  | 260,4  | 52,6 | 5  | b, c    |
| PF#289 |                                                                                                                                                                                                            | 5,0  | 7,4   | 294,1  | 50,0 | 4  | a, c    |
| PF#302 | UPF0237 protein                                                                                                                                                                                            | 4,6  | 9,8   | 68,1   | 14,6 | 1  | c       |
| PF#310 | none Aldose 1-epimerase 2.1 Metabolism of carbohydrates and related molecules                                                                                                                              | 5,5  | 32,2  | 441,3  | 32,6 | 6  | b       |
| PF#323 | none HesB protein 4.1 Adaptation to atypical conditions                                                                                                                                                    | 4,1  | 12,4  | 93,9   | 11,2 | 1  | c       |
| PF#326 | pspA Phage shock protein A 3.5.2 Transcription regulation                                                                                                                                                  | 5,3  | 28,7  | 68,0   | 12,1 | 2  | c       |
| PF#342 | pepC, (Blmh) Aminopeptidase C (Bleomycin hydrolase) 2.2 Metabolism of amino acids and related molecules                                                                                                    | 5,1  | 50,0  | 700,4  | 41,3 | 14 | a       |
| PF#347 | none Short chain dehydrogenase 4.6 Miscellaneous                                                                                                                                                           | 5,2  | 24,0  | 188,5  | 22,0 | 3  | b, c    |
| PF#348 | rpiB2 Ribose-5-phosphate isomerase 2 2.1.2 Main glycolytic pathways                                                                                                                                        | 4,7  | 17,2  | 74,3   | 11,7 | 1  | b       |
| PF#350 | glgB 1,4-alpha-glucan branching enzyme (Glycogen branching enzyme) (BE) (1,4-alpha-D-glucan:1,4-alpha-D-glucan 6-glucosyl-transferase) 2.1.1 Specific carbohydrate metabolic pathway                       | 5,2  | 72,6  | 106,1  | 5,5  | 3  | a, b    |
| PF#359 | metH methionine synthase (5-methyltetrahydrofolate:L-homocysteine S-methyltransferase)  2.2 Metabolism of amino acids and related molecules                                                                | 4,8  | 125,9 | 130,2  | 2,9  | 3  | b       |
| PF#377 | glpB Anaerobic glycerol-3-phosphate dehydrogenase subunit B 2.1.1 Specific carbohydrate metabolic pathway                                                                                                  | 5,3  | 45,9  | 961,9  | 53,7 | 16 | a, b, c |
| PF#378 | glpA Anaerobic glycerol-3-phosphate dehydrogenase subunit A 2.1.1 Specific carbohydrate metabolic pathway                                                                                                  | 5,6  | 58,8  | 305,2  | 20,3 | 8  | a, b, c |
| PF#379 | pf379 Putative carboxylic ester hydrolase 2.4 Metabolism of lipids                                                                                                                                         | 6,0  | 33,7  | 257,7  | 26,7 | 6  | b       |
| PF#384 | rplS 50S ribosomal protein L19 3.7.1 Ribosomal proteins                                                                                                                                                    | 10,4 | 13,2  | 85,9   | 15,3 | 2  | c       |
| PF#390 | fba1 Fructose-bisphosphate aldolase class II 2.1.2 Main glycolytic pathways                                                                                                                                | 5,2  | 36,9  | 738,6  | 44,4 | 12 | a, b, c |
| PF#397 | argK Kinase ArgK 1.2.5 Transport/binding of amino-acids                                                                                                                                                    | 5,4  | 36,0  | 200,4  | 17,2 | 4  | b       |
| PF#399 | asnB Asparagine synthase (Glutamine-hydrolyzing) 2.2 Metabolism of amino acids and related molecules                                                                                                       | 5,1  | 72,6  | 52,8   | 1,7  | 1  | c       |
| PF#400 | ilvD Dihydroxy-acid dehydratase 2.2 Metabolism of amino acids and related molecules                                                                                                                        | 5,1  | 65,0  | 278,9  | 13,5 | 6  | a, b    |

|        |                                                                                                                                                                                                     |      |      |        |      |    |         |
|--------|-----------------------------------------------------------------------------------------------------------------------------------------------------------------------------------------------------|------|------|--------|------|----|---------|
| PF#406 | none Protein of unknown function 5.2 Protein of unknown function similar to proteins from other organisms                                                                                           | 5,1  | 39,4 | 992,6  | 55,5 | 19 | a, b    |
| PF#422 | Forkhead-associated protein 1.3 Sensors (signal transduction)                                                                                                                                       | 4,7  | 17,3 | 81,3   | 14,2 | 2  | c       |
| PF#429 | gpt Putative purine phosphoribosyltransferase 2.3 Metabolism of nucleotides and nucleic acids                                                                                                       | 4,6  | 18,2 | 53,2   | 9,5  | 1  | c       |
| PF#453 | trx Thioredoxin 3.8 Protein modification                                                                                                                                                            | 4,0  | 15,5 | 75,8   | 8,5  | 1  | c       |
| PF#454 | none Forkhead-associated protein 1.3 Sensors (signal transduction)                                                                                                                                  | 5,6  | 26,0 | 48,5   | 4,6  | 1  | b       |
| PF#464 | rmlB (rfbB) DTP-glucose 4,6-dehydratase 2.1.4 Substrate-specific entries to carbohydrate metabolic pathway                                                                                          | 5,5  | 36,9 | 527,2  | 36,4 | 8  | a, b    |
| PF#465 | protein of unknown function 5.2 Protein of unknown function similar to proteins from other organisms                                                                                                | 4,9  | 43,4 | 556,6  | 46,2 | 12 | a, b, c |
| PF#476 | greA Transcription elongation factor GreA 3.5.2 Transcription regulation                                                                                                                            | 4,6  | 18,1 | 56,3   | 12,0 | 1  | c       |
| PF#485 | Pyruvate flavodoxin/ferredoxin oxidoreductase 1.4 Membrane bioenergetics (electron transport chain and ATP synthase)                                                                                | 5,4  | 67,4 | 294,9  | 14,3 | 5  | b       |
| PF#492 | iolA (msdA) iolA (Myo-inositol catabolism IolA protein) (Methylmalonic acid semialdehyde dehydrogenase) 2.1.1 Specific carbohydrate metabolic pathway                                               | 5,0  | 52,8 | 150,5  | 9,6  | 4  | a, c    |
| PF#501 | thrS Threonyl-tRNA synthetase (Threonine--tRNA ligase) (ThrRS) 3.7.2 Aminoacyl-tRNA synthetases                                                                                                     | 5,1  | 75,8 | 110,8  | 2,8  | 1  | b       |
| PF#506 | GntR-family protein transcriptional regulator 3.5.2 Transcription regulation                                                                                                                        | 8,0  | 27,4 | 65,3   | 14,0 | 2  | c       |
| PF#507 | tal2 Transaldolase 2 2.1.2 Main glycolytic pathways                                                                                                                                                 | 5,1  | 39,4 | 151,3  | 8,9  | 3  | c       |
| PF#508 | iolG1 iolG1 (Myo-inositol catabolism IolG1 protein) (myo-inositol 2-dehydrogenase) 2.1 Metabolism of carbohydrates and related molecules                                                            | 4,9  | 34,7 | 48,9   | 6,1  | 1  | b       |
| PF#518 | FAD-dependent pyridine nucleotide-disulphide oxidoreductase:4Fe-4S ferredoxin, iron-sulfur binding:Aromatic-ring hydroxylase 1.4 Membrane bioenergetics (electron transport chain and ATP synthase) | 5,5  | 59,8 | 897,2  | 37,9 | 18 | a, c    |
| PF#527 | ABC-type transporter 1.2 Transport/binding proteins and lipoproteins                                                                                                                                | 4,8  | 31,5 | 419,2  | 28,4 | 8  | a       |
| PF#528 | none ABC-type transporter 1.2 Transport/binding proteins and lipoproteins                                                                                                                           | 4,7  | 31,4 | 445,4  | 28,1 | 8  | a       |
| PF#532 | Uncharacterized ATPase related to the helicase subunit of the holliday junction resolvase 3.3 DNA recombination, and repair                                                                         | 5,6  | 50,2 | 64,6   | 5,5  | 2  | a       |
| PF#537 | pabC Aminooxychorismate lyase 2.5 Metabolism of coenzymes and prosthetic groups                                                                                                                     | 5,0  | 43,8 | 77,7   | 6,3  | 2  | a       |
| PF#540 | Short chain dehydrogenase 1.4 Membrane bioenergetics (electron transport chain and ATP synthase)                                                                                                    | 5,4  | 24,3 | 246,1  | 20,7 | 4  | b       |
| PF#561 | degQ secreted serine protease, trypsin-like serine proteases 1.2.1 Transport/binding of proteins/peptides                                                                                           | 4,4  | 47,8 | 376,9  | 15,8 | 6  | a       |
| PF#566 | parB chromosome partitioning protein 3.4 DNA packaging and segregation                                                                                                                              | 5,7  | 36,2 | 178,8  | 12,5 | 3  | b       |
| PF#569 | rpI 50S ribosomal protein L9 3.7.1 Ribosomal proteins                                                                                                                                               | 9,4  | 16,1 | 209,3  | 29,3 | 4  | c       |
| PF#570 | tpsR 30S ribosomal protein S18 3.7.1 Ribosomal proteins                                                                                                                                             | 11,0 | 9,0  | 121,2  | 29,1 | 2  | c       |
| PF#571 | ssb Single-strand binding protein 3.1 DNA replication                                                                                                                                               | 5,2  | 19,6 | 406,8  | 41,0 | 5  | a, b, c |
| PF#603 | pyrG CTP synthase (UTP--ammonia ligase) (CTP synthetase) 2.3 Metabolism of nucleotides and nucleic acids                                                                                            | 6,2  | 63,8 | 67,7   | 2,9  | 1  | c       |
| PF#623 | cysS Cysteine--tRNA ligase 3.7.2 Aminoacyl-tRNA synthetases                                                                                                                                         | 4,8  | 46,0 | 280,8  | 17,9 | 6  | a       |
| PF#635 | lpdB Dihydrolipoyl dehydrogenase 1.4 Membrane bioenergetics (electron transport chain and ATP synthase)                                                                                             | 5,3  | 49,9 | 391,7  | 23,7 | 8  | a       |
| PF#649 | yghU glutathione S-transferase 4.2 Detoxification                                                                                                                                                   | 6,9  | 20,0 | 214,1  | 23,8 | 3  | b       |
| PF#650 | yghU glutathione S-transferase 4.2 Detoxification                                                                                                                                                   | 4,9  | 18,7 | 103,9  | 14,9 | 2  | a, b    |
| PF#658 | ll                                                                                                                                                                                                  | 9,4  | 11,1 | 78,9   | 15,1 | 1  | c       |
| PF#660 | katA Catalase 4.1 Adaptation to atypical conditions                                                                                                                                                 | 5,1  | 53,6 | 1763,4 | 71,2 | 31 | a, b    |
| PF#661 | Peroxidase 4.6 Miscellaneous                                                                                                                                                                        | 4,6  | 32,9 | 195,3  | 16,4 | 5  | b, c    |
| PF#667 | pf667 Carboxylic ester hydrolase 2.4 Metabolism of lipids                                                                                                                                           | 4,9  | 34,2 | 464,9  | 28,8 | 7  | b       |

|        |                                                                                                                                                                                                |      |       |        |      |    |         |
|--------|------------------------------------------------------------------------------------------------------------------------------------------------------------------------------------------------|------|-------|--------|------|----|---------|
| PF#668 | ugpQ Glycerophosphoryl diester phosphodiesterase 2.4 Metabolism of lipids                                                                                                                      | 4,6  | 28,1  | 315,0  | 41,6 | 6  | b, c    |
| PF#684 | glyQS Glycyl-tRNA synthetase (Glycine--tRNA ligase) (GlyRS) 3.7.2 Aminoacyl-tRNA synthetases                                                                                                   | 5,5  | 52,9  | 248,0  | 11,0 | 4  | b       |
| PF#687 | nuoI NADH-quinone oxidoreductase subunit I (NADH dehydrogenase I subunit I) (NDH-1 subunit I) 1.4 Membrane bioenergetics (electron transport chain and ATP synthase)                           | 5,7  | 21,5  | 71,6   | 12,6 | 2  | b, c    |
| PF#698 | carB (pyrA) Carbamoyl-phosphate synthase large chain (Carbamoyl- phosphate synthetase ammonia chain) 2.2 Metabolism of amino acids and related molecules                                       | 4,8  | 120,7 | 285,6  | 7,0  | 5  | a, b    |
| PF#699 | carA Carbamoyl-phosphate synthase small chain 1.2.6 Transport/binding of nucleosides, nucleotides, purines and pyrimidines                                                                     | 5,1  | 42,5  | 318,0  | 19,0 | 5  | a, c    |
| PF#701 | efp Elongation factor P 3.7.4 Translation elongation                                                                                                                                           | 4,7  | 20,6  | 158,2  | 12,8 | 3  | b, c    |
| PF#710 | none Hypothetical protein 5.2 Protein of unknown function similar to proteins from other organisms                                                                                             | 4,8  | 56,9  | 641,0  | 26,6 | 10 | a       |
| PF#712 | ppaX pyrophosphatase PpaX 2.6 Metabolism of phosphate                                                                                                                                          | 4,5  | 23,2  | 53,8   | 5,5  | 1  | a, b    |
| PF#717 | Glutamine synthetase 2.8 Metabolism of nitrogen/nitrate and nitrite                                                                                                                            | 4,8  | 54,1  | 418,1  | 21,3 | 6  | b, c    |
| PF#721 | aroA 3-phosphoshikimate 1-carboxyvinyltransferase (phosphoenolpyruvate:3-phosphoshikimate5-O-(1-carboxyvinyl)-transferase) (EPSP synthase) 2.2 Metabolism of amino acids and related molecules | 6,0  | 46,8  | 212,8  | 12,2 | 4  | b       |
| PF#731 | mpg 3-methyladenine DNA glycosylase 3.3 DNA recombination, and repair                                                                                                                          | 5,4  | 22,9  | 79,8   | 15,3 | 2  | b       |
| PF#733 |                                                                                                                                                                                                | 5,2  | 14,9  | 186,2  | 25,4 | 4  | a       |
| PF#749 | argS Arginyl-tRNA synthetase (Arginine--tRNA ligase) (ArgRS) 3.7.2 Aminoacyl-tRNA synthetases                                                                                                  | 5,1  | 59,9  | 183,4  | 8,8  | 3  | b       |
| PF#758 | rplD 50S ribosomal protein L4 3.7.1 Ribosomal proteins                                                                                                                                         | 9,8  | 24,8  | 247,7  | 25,3 | 5  | c       |
| PF#759 | rplW 50S ribosomal protein L23 3.7.1 Ribosomal proteins                                                                                                                                        | 9,6  | 11,5  | 76,5   | 29,1 | 2  | c       |
| PF#760 | rplB 50S ribosomal protein L2 3.7.1 Ribosomal proteins                                                                                                                                         | 11,1 | 30,4  | 259,4  | 26,3 | 5  | c       |
| PF#761 | rpsS 30S ribosomal protein S19 3.7.1 Ribosomal proteins                                                                                                                                        | 10,8 | 10,6  | 129,9  | 43,0 | 3  | c       |
| PF#762 | rplV 50S ribosomal protein L22 3.7.1 Ribosomal proteins                                                                                                                                        | 10,5 | 17,3  | 102,0  | 23,6 | 3  | c       |
| PF#763 | rpsC 30S ribosomal protein S3 3.7.1 Ribosomal proteins                                                                                                                                         | 10,7 | 30,0  | 241,3  | 12,5 | 4  | c       |
| PF#764 | rplP 50S ribosomal protein L16 3.7.1 Ribosomal proteins                                                                                                                                        | 10,5 | 15,7  | 191,7  | 48,9 | 4  | c       |
| PF#765 | rpmC 50S ribosomal protein L29 3.7.1 Ribosomal proteins                                                                                                                                        | 6,6  | 9,3   | 211,7  | 36,6 | 3  | c       |
| PF#767 | rplN 50S ribosomal protein L14 3.7.1 Ribosomal proteins                                                                                                                                        | 10,0 | 13,3  | 78,5   | 19,5 | 2  | c       |
| PF#768 | rplX 50S ribosomal protein L24 3.7.1 Ribosomal proteins                                                                                                                                        | 10,4 | 13,2  | 128,3  | 28,5 | 2  | c       |
| PF#769 | rplE 50S ribosomal protein L5 3.7.1 Ribosomal proteins                                                                                                                                         | 9,6  | 24,7  | 237,9  | 18,6 | 3  | c       |
| PF#770 | rpsN1, rpsZ 30S ribosomal protein S14 type Z 3.7.1 Ribosomal proteins                                                                                                                          | 11,3 | 6,9   | 76,7   | 21,3 | 1  | c       |
| PF#771 | rpsH 30S ribosomal protein S8 3.7.1 Ribosomal proteins                                                                                                                                         | 9,3  | 14,8  | 201,3  | 35,6 | 3  | c       |
| PF#772 | rplF 50S ribosomal protein L6 3.7.1 Ribosomal proteins                                                                                                                                         | 9,4  | 19,7  | 185,2  | 25,0 | 4  | c       |
| PF#773 | rplR Ribosomal protein L18 3.7.1 Ribosomal proteins                                                                                                                                            | 11,4 | 14,0  | 325,6  | 42,5 | 5  | b, c    |
| PF#778 |                                                                                                                                                                                                | 6,2  | 33,7  | 1077,7 | 43,4 | 16 | a       |
| PF#779 | none Protein of unknown function  5.2 Protein of unknown function similar to proteins from other organisms                                                                                     | 5,9  | 13,8  | 54,4   | 10,0 | 1  | b       |
| PF#803 | none Membran protein of unknown function 5.2 Protein of unknown function similar to proteins from other organisms                                                                              | 5,7  | 17,0  | 152,6  | 18,9 | 3  | c       |
| PF#808 | glutathione S-transferase  3.9 Protein folding                                                                                                                                                 | 5,4  | 38,1  | 438,2  | 30,1 | 7  | b       |
| PF#823 | none two component system response regulator 3.5.2 Transcription regulation                                                                                                                    | 5,0  | 26,9  | 78,5   | 16,5 | 2  | b, c    |
| PF#824 | none ABC-type transport systems, periplasmic component 1.2.5 Transport/binding of amino-acids                                                                                                  | 6,4  | 34,0  | 47,3   | 4,0  | 1  | b       |
| PF#842 | Thiamine pyrophosphate enzyme                                                                                                                                                                  | 5,1  | 62,9  | 1108,2 | 41,4 | 22 | a, b, c |

|         |                                                                                                                                                         |      |       |        |      |    |         |
|---------|---------------------------------------------------------------------------------------------------------------------------------------------------------|------|-------|--------|------|----|---------|
| PF#849  | galE UDP-glucose 4-epimerase 2.1.1 Specific carbohydrate metabolic pathway                                                                              | 5,4  | 35,1  | 674,3  | 50,0 | 11 | a, b    |
| PF#856  | protein of unknown function 5.2 Protein of unknown function similar to proteins from other organisms                                                    | 6,0  | 32,8  | 63,9   | 5,7  | 2  | b       |
| PF#858  | ppdk Pyruvate phosphate dikinase 2.1 Metabolism of carbohydrates and related molecules                                                                  | 4,8  | 95,8  | 2845,1 | 79,7 | 52 | a, b, c |
| PF#876  | dac carboxypeptidase (serine-type D-Ala-D-Ala carboxypeptidase) (D-alanyl-D-alanine-carboxypeptidase) 3.10 Protein degradation                          | 5,4  | 46,0  | 317,9  | 14,5 | 5  | a       |
| PF#877  | Inorganic pyrophosphatase 2.6 Metabolism of phosphate                                                                                                   | 4,5  | 21,2  | 84,2   | 10,8 | 1  | b, c    |
| PF#886  | ponA Penicillin-binding protein (Transglycosylase/transpeptidase) 1.1 Cell wall                                                                         | 4,9  | 77,9  | 105,8  | 4,1  | 2  | a       |
| PF#893  | CE1826, ptsI PTS enzyme I                                                                                                                               | 5,1  | 57,7  | 552,8  | 30,0 | 12 | a, b    |
| PF#894  | Phosphocarrier, HPr family 1.2 Transport/binding proteins and lipoproteins                                                                              | 4,2  | 9,0   | 111,3  | 25,0 | 1  | c       |
| PF#896  | rpsL 30S ribosomal protein S12 3.7.1 Ribosomal proteins                                                                                                 | 11,5 | 13,6  | 68,9   | 6,5  | 1  | c       |
| PF#897  | rpoC DNA-directed RNA polymerase beta chain (RNAP beta subunit) (Transcriptase beta chain) (RNA polymerase beta subunit) 3.5.3 Transcription elongation | 7,8  | 143,5 | 198,1  | 4,2  | 4  | c       |
| PF#898  | rpoB DNA-directed RNA polymerase beta chain (RNAP beta subunit) (Transcriptase beta chain) (RNA polymerase subunit beta) 3.5.3 Transcription elongation | 4,8  | 128,6 | 258,6  | 6,7  | 6  | b, c    |
| PF#906  | ATP binding protein of ABC transporter 1.2 Transport/binding proteins and lipoproteins                                                                  | 5,9  | 30,9  | 218,1  | 20,5 | 3  | b       |
| PF#907  | ABC transporter permease 1.2 Transport/binding proteins and lipoproteins                                                                                | 9,5  | 83,5  | 56,3   | 1,3  | 1  | a       |
| PF#908  | dkgA 2,5-diketo-D-gluconate reductase A 2.5 Metabolism of coenzymes and prosthetic groups                                                               | 5,0  | 30,4  | 534,8  | 60,0 | 12 | a, b, c |
| PF#925  | dnaK1 Chaperone protein dnaK 1 (Heat shock protein 70 1) (Heat shock 70 kDa protein 1) (HSP70 1) 3.9 Protein folding                                    | 4,8  | 65,4  | 2125,0 | 67,3 | 37 | a, b, c |
| PF#928  | hspR1 Heat shock protein transcriptional repressor HspR1 (HspR1 protein) 3.5.2 Transcription regulation                                                 | 11,1 | 15,8  | 66,3   | 20,1 | 2  | c       |
| PF#933  | yghZ Oxidoreductase 4.2 Detoxification                                                                                                                  | 5,6  | 38,8  | 213,3  | 13,4 | 4  | b       |
| PF#934  | gltA Citrate synthase 1 2.1.3 TCA cycle                                                                                                                 | 5,6  | 47,5  | 790,6  | 45,9 | 15 | a, b    |
| PF#935  | none Protein of unknown function 5.2 Protein of unknown function similar to proteins from other organisms                                               | 5,2  | 19,9  | 275,0  | 41,5 | 5  | b       |
| PF#936  | fba2 Fructose-bisphosphate aldolase class I 2.1.2 Main glycolytic pathways                                                                              | 5,0  | 32,3  | 942,4  | 74,2 | 15 | a, b, c |
| PF#944  | aldB Aldehyde dehydrogenase B (Lactaldehyde dehydrogenase) 2.1.1 Specific carbohydrate metabolic pathway                                                | 4,7  | 53,4  | 319,8  | 17,5 | 5  | b       |
| PF#961  | hypothetical protein 6 Protein of unknown function, without similarity to other proteins                                                                | 5,2  | 8,5   | 65,9   | 17,1 | 1  | c       |
| PF#962  | pf962 Carboxylic ester hydrolase 2.4 Metabolism of lipids                                                                                               | 5,7  | 39,9  | 472,7  | 33,3 | 9  | b       |
| PF#963  | cell-wall peptidases, NlpC/P60 family secreted protein 1.1 Cell wall                                                                                    | 4,8  | 58,8  | 2328,4 | 80,4 | 34 | a, b    |
| PF#971  | none Methylmalonyl-CoA carboxyltransferase 5S subunit. (transcarboxylase 5S) 505 bp 2.1.1 Specific carbohydrate metabolic pathway                       | 5,4  | 55,6  | 1237,1 | 54,3 | 25 | a, b, c |
| PF#972  | none Methylmalonyl-CoA carboxyltransferase 12S subunit (EC2.1.3.1) (Transcarboxylase 12S subunit). 610 bp 2.1.1 Specific carbohydrate metabolic pathway | 5,4  | 56,4  | 1755,4 | 77,3 | 32 | a, b, c |
| PF#973  | none hypothetical protein                                                                                                                               | 4,7  | 8,8   | 46,2   | 9,8  | 1  | c       |
| PF#974  | bccp Methylmalonyl-CoA carboxyltransferase , 1.3S subunit (Transcarboxylase, 1.3S subunit). 123bp 2.1.1 Specific carbohydrate metabolic pathway         | 5,4  | 12,4  | 217,7  | 39,8 | 3  | b, c    |
| PF#977  | gpm2 phosphoglycerate mutase 2.1.2 Main glycolytic pathways                                                                                             | 5,8  | 28,0  | 552,0  | 59,8 | 11 | a, b, c |
| PF#982  | Nitroreductase 1.4 Membrane bioenergetics (electron transport chain and ATP synthase)                                                                   | 5,1  | 18,6  | 161,6  | 23,1 | 3  | b       |
| PF#988  | cpsA Carboxypeptidase 3.10 Protein degradation                                                                                                          | 5,1  | 44,3  | 258,0  | 17,7 | 5  | b, c    |
| PF#991  | cys2 cysteine synthase 2 2.2 Metabolism of amino acids and related molecules                                                                            | 5,1  | 33,6  | 759,4  | 58,4 | 10 | a, b, c |
| PF#995  | protein with unknown function 5.2 Protein of unknown function similar to proteins from other organisms                                                  | 5,2  | 5,7   | 79,3   | 18,2 | 1  | c       |
| PF#1000 | dapD 2,3,4,5-tetrahydropyridine-2,6-dicarboxylate N-succinyltransferase 2.2 Metabolism of amino acids and related molecules                             | 5,9  | 32,6  | 279,1  | 23,4 | 6  | a, b    |

|         |                                                                                                                                                                |      |      |        |      |    |         |
|---------|----------------------------------------------------------------------------------------------------------------------------------------------------------------|------|------|--------|------|----|---------|
| PF#1002 | laminotransferase 2.2 Metabolism of amino acids and related molecules                                                                                          | 5,9  | 39,0 | 127,9  | 16,5 | 3  | a       |
| PF#1003 | fdxA Ferredoxin 1.4 Membrane bioenergetics (electron transport chain and ATP synthase)                                                                         | 4,0  | 11,7 | 72,8   | 12,3 | 1  | c       |
| PF#1004 | gya Glyoxylate reductase                                                                                                                                       | 5,3  | 34,1 | 420,4  | 28,9 | 6  | b, c    |
| PF#1032 | rpmI 50S ribosomal protein L35 3.7.1 Ribosomal proteins                                                                                                        | 11,8 | 7,1  | 49,3   | 20,3 | 1  | a       |
| PF#1033 | rplT 50S ribosomal protein L20 3.7.1 Ribosomal proteins                                                                                                        | 10,8 | 13,8 | 56,8   | 14,6 | 1  | c       |
| PF#1036 | pheS Phenylalanyl-tRNA synthetase alpha chain (Phenylalanine--tRNA ligase alpha chain) (PheRS) 3.7.2 Aminoacyl-tRNA synthetases                                | 5,7  | 39,8 | 145,6  | 11,5 | 2  | b       |
| PF#1042 | gpm1 phosphoglycerate mutase/fructose-2,6-bisphosphatase 2.1.2 Main glycolytic pathways                                                                        | 4,8  | 26,1 | 90,9   | 10,5 | 2  | b       |
| PF#1044 | trxB Thioredoxin reductase 3.8 Protein modification                                                                                                            | 4,6  | 34,5 | 81,2   | 4,9  | 1  | b       |
| PF#1058 | lsec secreted transglycosylase 1.1 Cell wall                                                                                                                   | 5,7  | 20,0 | 1641,3 | 63,9 | 24 | a, c    |
| PF#1064 | lipA Lipoic acid synthetase 4.6 Miscellaneous                                                                                                                  | 5,4  | 35,3 | 94,0   | 8,9  | 2  | b       |
| PF#1066 | rplA 50S ribosomal protein L1 3.7.1 Ribosomal proteins                                                                                                         | 9,0  | 25,4 | 322,7  | 27,5 | 4  | c       |
| PF#1067 | rplK 50S ribosomal protein L11 3.7.1 Ribosomal proteins                                                                                                        | 9,5  | 14,9 | 252,4  | 26,8 | 3  | c       |
| PF#1068 | nusG Transcription antitermination protein NusG 3.5.4 Transcription termination                                                                                | 4,3  | 32,4 | 169,6  | 11,9 | 3  | c       |
| PF#1077 | gnd 6-phosphogluconic dehydrogenase 1 2.1.2 Main glycolytic pathways                                                                                           | 5,3  | 52,6 | 818,0  | 41,4 | 13 | a, b    |
| PF#1084 | cobA CobA Uroporphyrinogen III methyltransferase 2.5 Metabolism of coenzymes and prosthetic groups                                                             | 5,6  | 27,1 | 390,6  | 38,5 | 6  | b, c    |
| PF#1092 | dnaK2 Chaperone protein dnaK 2 (Heat shock protein 70 2) (Heat shock 70 kDa protein 2) (HSP70 2) 3.9 Protein folding                                           | 4,7  | 67,2 | 1614,5 | 51,6 | 27 | a, b, c |
| PF#1093 | grpE2 Protein GrpE 2 (HSP-70 cofactor 2) (Co-chaperone protein GrpE2) 3.9 Protein folding                                                                      | 4,7  | 23,0 | 136,7  | 19,9 | 3  | b, c    |
| PF#1097 | ask Aspartokinase (Aspartate kinase) 2.2 Metabolism of amino acids and related molecules                                                                       | 5,1  | 44,9 | 74,7   | 3,8  | 1  | c       |
| PF#1107 | folE GTP cyclohydrolase I (GTP-CH-I) 2.5 Metabolism of coenzymes and prosthetic groups                                                                         | 6,1  | 24,9 | 67,3   | 10,2 | 2  | b, c    |
| PF#1111 | folK Putative hydroxymethylidihydropteridine pyrophosphokinase 2.5 Metabolism of coenzymes and prosthetic groups                                               | 5,1  | 19,8 | 92,0   | 9,4  | 2  | b       |
| PF#1114 | clpC chaperone clpC (Clp-family ATP-binding protease) (ATP-dependent Clp protease ATP-binding subunit) 3.9 Protein folding                                     | 5,2  | 94,3 | 202,3  | 6,5  | 4  | a, c    |
| PF#1122 | pyrE Orotate phosphoribosyltransferase (OPRT) (OPRTase) 2.3 Metabolism of nucleotides and nucleic acids                                                        | 4,9  | 19,3 | 91,0   | 15,1 | 2  | b       |
| PF#1135 | GTP phosphohydrolase (mRNA-translation-assisting) 3.7.4 Translation elongation                                                                                 | 4,9  | 75,8 | 378,7  | 18,0 | 9  | a, b    |
| PF#1136 | rplM 50S ribosomal protein L13 3.7.1 Ribosomal proteins                                                                                                        | 9,7  | 16,1 | 303,3  | 47,6 | 4  | c       |
| PF#1139 | glmM Phosphoglucosamine mutase 2.2 Metabolism of amino acids and related molecules                                                                             | 5,0  | 47,2 | 58,9   | 4,4  | 1  | c       |
| PF#1140 | hemB Delta-aminolevulinic acid dehydratase (Porphobilinogen synthase) 2.5 Metabolism of coenzymes and prosthetic groups                                        | 4,9  | 35,8 | 241,6  | 23,8 | 5  | b       |
| PF#1144 | gab Aldehyde dehydrogenase (Succinate-semialdehyde dehydrogenase) (NAD-dependent aldehyde dehydrogenase) 2.1 Metabolism of carbohydrates and related molecules | 4,9  | 52,2 | 258,8  | 13,9 | 6  | a, b    |
| PF#1146 | polA Putative DNA polymerase I 3.1 DNA replication                                                                                                             | 5,0  | 98,6 | 69,3   | 1,5  | 1  | b       |
| PF#1147 | two-component system response regulator 3.5.2 Transcription regulation                                                                                         | 4,6  | 22,6 | 186,7  | 28,0 | 4  | b, c    |
| PF#1148 | pyk1 Pyruvate kinase 1 2.1.2 Main glycolytic pathways                                                                                                          | 5,2  | 54,0 | 886,3  | 47,7 | 16 | a, b, c |
| PF#1151 | dskA Transcriptional regulators, TraR/DksA family 3.5.2 Transcription regulation                                                                               | 4,7  | 15,7 | 111,5  | 15,5 | 2  | c       |
| PF#1152 | none Protein of unknown function 5.2 Protein of unknown function similar to proteins from other organisms                                                      | 4,8  | 36,5 | 474,1  | 29,8 | 7  | b, c    |
| PF#1166 | 2-dehydropantoate 2-reductase                                                                                                                                  | 5,8  | 32,6 | 203,2  | 16,0 | 3  | b       |
| PF#1167 | none Transcriptional regulator, RpiR family 3.5.2 Transcription regulation                                                                                     | 5,0  | 29,9 | 139,8  | 19,0 | 3  | b       |

|         |                                                                                                                                                                                                                             |      |       |        |      |    |         |
|---------|-----------------------------------------------------------------------------------------------------------------------------------------------------------------------------------------------------------------------------|------|-------|--------|------|----|---------|
| PF#1180 | gyrA DNA gyrase subunit A 3.1 DNA replication                                                                                                                                                                               | 5,0  | 100,6 | 63,4   | 1,4  | 1  | c       |
| PF#1193 | Restriction endonuclease PvuRts1  3.2 DNA restriction and modification (and repair)                                                                                                                                         | 5,6  | 35,3  | 356,3  | 23,1 | 7  | a       |
| PF#1197 | none Protein of unknown function 5.2 Protein of unknown function similar to proteins from other organisms                                                                                                                   | 4,5  | 27,1  | 67,6   | 8,7  | 2  | c       |
| PF#1204 | namA NADH-dependent flavin oxidoreductase 1.4 Membrane bioenergetics (electron transport chain and ATP synthase)                                                                                                            | 4,8  | 39,1  | 69,0   | 5,9  | 1  | c       |
| PF#1214 | ispG 4-hydroxy-3-methylbut-2-en-1-yl diphosphate synthase (1-hydroxy-2-methyl-2-(E)-butenyl 4-diphosphate synthase) 2.5 Metabolism of coenzymes and prosthetic groups                                                       | 5,8  | 41,1  | 92,3   | 7,2  | 2  | b, c    |
| PF#1215 | dxr 1-deoxy-D-xylulose 5-phosphate reductoisomerase (DXP reductoisomerase) (1-deoxyxylulose-5-phosphate reductoisomerase) (2-C- methyl-D-erythritol 4-phosphate synthase) 2.5 Metabolism of coenzymes and prosthetic groups | 5,4  | 41,4  | 373,4  | 26,6 | 7  | a       |
| PF#1218 | frr Ribosome recycling factor (Ribosome-releasing factor) (RRF) 3.7.5 Translation termination                                                                                                                               | 5,7  | 20,5  | 107,9  | 14,1 | 2  | b       |
| PF#1219 | pyrH Uridylate kinase PyrH 2.3 Metabolism of nucleotides and nucleic acids                                                                                                                                                  | 4,8  | 27,0  | 81,6   | 16,5 | 2  | b       |
| PF#1220 | rpsB 30S ribosomal protein S2 3.7.1 Ribosomal proteins                                                                                                                                                                      | 5,1  | 35,6  | 255,8  | 18,5 | 5  | c       |
| PF#1226 | PPA1530 ABC transporter ATP-binding protein 1.2 Transport/binding proteins and lipoproteins                                                                                                                                 | 5,4  | 28,9  | 264,5  | 20,5 | 5  | a, b    |
| PF#1228 | inhA Enoyl-[acyl-carrier-protein] reductase [NADH] 2.4 Metabolism of lipids                                                                                                                                                 | 4,7  | 26,8  | 334,1  | 30,4 | 4  | b       |
| PF#1235 | ABC transporter ATP-binding protein 1.2 Transport/binding proteins and lipoproteins                                                                                                                                         | 5,6  | 39,6  | 443,6  | 35,9 | 9  | a, b, c |
| PF#1236 | metB Cystathionine gamma-synthase ( O-succinylhomoserine (thiol)-lyase) 2.2 Metabolism of amino acids and related molecules                                                                                                 | 5,2  | 41,6  | 346,3  | 23,8 | 5  | b       |
| PF#1239 | rpmA 50S ribosomal protein L27 3.7.1 Ribosomal proteins                                                                                                                                                                     | 11,6 | 9,3   | 122,4  | 29,9 | 2  | a, c    |
| PF#1244 | proA Gamma-glutamyl phosphate reductase (GPR) (Glutamate-5- semialdehyde dehydrogenase) (Glutamyl-gamma-semialdehyde dehydrogenase) (GSA dehydrogenase) 2.2 Metabolism of amino acids and related molecules                 | 5,2  | 43,6  | 374,7  | 22,8 | 6  | b       |
| PF#1246 | nadD Probable nicotinate-nucleotide adenyltransferase 2.5 Metabolism of coenzymes and prosthetic groups                                                                                                                     | 5,1  | 28,0  | 55,1   | 6,3  | 1  | b       |
| PF#1253 | leuS Leucyl-tRNA synthetase (Leucine--tRNA ligase) (LeuRS) 3.7.2 Aminoacyl-tRNA synthetases                                                                                                                                 | 5,5  | 93,7  | 203,6  | 5,7  | 4  | a, b    |
| PF#1256 | rnc Ribonuclease III 3.5.2 Transcription regulation                                                                                                                                                                         | 5,2  | 26,0  | 108,7  | 13,8 | 3  | b       |
| PF#1260 |                                                                                                                                                                                                                             | 4,7  | 15,2  | 62,0   | 10,0 | 1  | b, c    |
| PF#1264 | Beta-lactamase-like:RNA-metabolising metallo-beta-lactamase                                                                                                                                                                 | 5,9  | 61,1  | 198,9  | 9,3  | 4  | b, c    |
| PF#1269 | rpsO 30S ribosomal protein S15 3.7.1 Ribosomal proteins                                                                                                                                                                     | 9,9  | 10,2  | 59,5   | 10,3 | 1  | c       |
| PF#1277 |                                                                                                                                                                                                                             | 4,1  | 19,5  | 110,3  | 14,1 | 2  | c       |
| PF#1293 | phk Phosphoketolase pyrophosphate 2.1.2 Main glycolytic pathways                                                                                                                                                            | 5,6  | 96,7  | 194,8  | 5,9  | 4  | b       |
| PF#1300 | menB Naphthoate synthase (Dihydroxynaphthoic acid synthetase) 2.5 Metabolism of coenzymes and prosthetic groups                                                                                                             | 5,3  | 36,7  | 668,0  | 53,9 | 11 | a, b, c |
| PF#1301 | pncB Nicotinate phosphoribosyltransferase 2.5 Metabolism of coenzymes and prosthetic groups                                                                                                                                 | 4,9  | 48,3  | 220,5  | 9,8  | 3  | b       |
| PF#1328 | protein of unknown function 5.2 Protein of unknown function similar to proteins from other organisms                                                                                                                        | 5,3  | 37,8  | 2304,4 | 66,2 | 36 | a, b    |
| PF#1330 | rplQ 50S ribosomal protein L17 3.7.1 Ribosomal proteins                                                                                                                                                                     | 9,6  | 21,4  | 199,1  | 19,5 | 3  | c       |
| PF#1333 | rpsD 30S ribosomal protein S4 3.7.1 Ribosomal proteins                                                                                                                                                                      | 10,1 | 23,3  | 278,9  | 30,3 | 6  | c       |
| PF#1335 | rpsM 30S ribosomal protein S13 3.7.1 Ribosomal proteins                                                                                                                                                                     | 10,7 | 14,0  | 96,2   | 12,1 | 1  | b, c    |
| PF#1337 | infA Translation initiation factor IF-1 3.5.2 Transcription regulation                                                                                                                                                      | 9,5  | 8,4   | 73,1   | 16,4 | 1  | c       |
| PF#1339 | protein of unknown function 5.2 Protein of unknown function similar to proteins from other organisms                                                                                                                        | 4,8  | 10,6  | 105,9  | 26,6 | 2  | b, c    |
| PF#1342 | adk Adenylate kinase (EC 2.7.4.3) (ATP-AMP transphosphorylase) 1.2.6 Transport/binding of nucleosides, nucleotides, purines and pyrimidines                                                                                 | 4,7  | 20,4  | 65,5   | 13,1 | 2  | b       |
| PF#1347 | oppA Periplasmic oligopeptide-binding lipoprotein OppA 1.2.1 Transport/binding of proteins/peptides                                                                                                                         | 5,1  | 61,5  | 454,4  | 16,3 | 8  | a       |

|         |                                                                                                                                                                      |     |      |        |      |    |         |
|---------|----------------------------------------------------------------------------------------------------------------------------------------------------------------------|-----|------|--------|------|----|---------|
| PF#1350 | clpP1 ATP-dependent Clp protease proteolytic subunit 1 (Endopeptidase Clp 1) 3.10 Protein degradation                                                                | 5,1 | 22,6 | 526,5  | 51,7 | 9  | a, b    |
| PF#1351 | clpP2 ATP-dependent Clp protease proteolytic subunit 2 (Endopeptidase Clp 2) 3.10 Protein degradation                                                                | 4,7 | 24,8 | 164,4  | 22,7 | 3  | b, c    |
| PF#1403 | dnaN DNA polymerase III, beta chain 3.1 DNA replication                                                                                                              | 4,8 | 41,5 | 404,6  | 21,8 | 5  | b, c    |
| PF#1439 | nuoC NADH dehydrogenase I chain C 1.4 Membrane bioenergetics (electron transport chain and ATP synthase)                                                             | 5,4 | 28,7 | 762,3  | 64,7 | 13 | a, b, c |
| PF#1440 | nuoD NADH dehydrogenase I chain D 1.4 Membrane bioenergetics (electron transport chain and ATP synthase)                                                             | 4,8 | 50,3 | 1280,7 | 63,5 | 25 | a, b, c |
| PF#1441 | nuoE NADH-quinone oxidoreductase chain E 1.4 Membrane bioenergetics (electron transport chain and ATP synthase)                                                      | 4,9 | 25,9 | 83,2   | 6,6  | 1  | c       |
| PF#1442 | nuoF NADH-quinone oxidoreductase chain F (NADH dehydrogenase I, chain F) (NDH-1, chain F) 1.4 Membrane bioenergetics (electron transport chain and ATP synthase)     | 5,7 | 48,6 | 491,0  | 28,9 | 11 | a, b    |
| PF#1445 | serS1 Seryl-tRNA synthetase 3.7.2 Aminoacyl-tRNA synthetases                                                                                                         | 5,0 | 47,3 | 155,7  | 12,3 | 3  | b       |
| PF#1446 | hypothetical protein 5.2 Protein of unknown function similar to proteins from other organisms                                                                        | 4,9 | 24,4 | 188,8  | 25,7 | 5  | b, c    |
| PF#1453 | tpx thiol peroxidase 3.8 Protein modification                                                                                                                        | 4,9 | 17,4 | 304,1  | 39,4 | 5  | b       |
| PF#1454 | npdA Silent information regulator protein Sir2 /NAD-dependent deacetylase 4.6 Miscellaneous                                                                          | 5,5 | 26,8 | 111,3  | 10,1 | 2  | b       |
| PF#1456 | argG Argininosuccinate synthase 2.2 Metabolism of amino acids and related molecules                                                                                  | 5,0 | 52,6 | 257,8  | 13,2 | 5  | b       |
| PF#1457 | NADPH:quinone reductase and related Zn-dependent oxidoreductases  1.4 Membrane bioenergetics (electron transport chain and ATP synthase)                             | 5,6 | 33,7 | 94,9   | 5,0  | 2  | b       |
| PF#1472 | purS Phosphoribosylformylglycinamide synthetase PurS 2.3 Metabolism of nucleotides and nucleic acids                                                                 | 4,9 | 8,9  | 64,5   | 21,0 | 1  | c       |
| PF#1484 | tkt Transketolase 2.1.2 Main glycolytic pathways                                                                                                                     | 5,0 | 74,1 | 306,3  | 10,8 | 5  | a, b, c |
| PF#1486 | araM L-arabinose utilization protein 2.1.1 Specific carbohydrate metabolic pathway                                                                                   | 5,0 | 49,7 | 848,9  | 40,4 | 13 | a       |
| PF#1500 | atpF ATP synthase B chain (F0F1 ATP synthase subunit B) 1.4 Membrane bioenergetics (electron transport chain and ATP synthase)                                       | 5,3 | 20,2 | 127,7  | 17,4 | 2  | c       |
| PF#1502 | atpA ATP synthase subunit alpha (ATPase subunit alpha) (ATP synthase F1 sector subunit alpha) 1.4 Membrane bioenergetics (electron transport chain and ATP synthase) | 5,1 | 61,3 | 496,5  | 19,5 | 9  | a, b, c |
| PF#1504 | atpD ATP synthase subunit beta (ATPase subunit beta) (ATP synthase F1 sector subunit beta) 1.4 Membrane bioenergetics (electron transport chain and ATP synthase)    | 4,7 | 52,5 | 383,5  | 17,4 | 6  | a, c    |
| PF#1505 | atpC ATP synthase epsilon chain (ATP synthase F1 sector epsilon subunit) 1.4 Membrane bioenergetics (electron transport chain and ATP synthase)                      | 4,6 | 16,7 | 59,4   | 13,5 | 2  | c       |
| PF#1509 | pf1509 Putative carboxylic ester hydrolase 2.4 Metabolism of lipids                                                                                                  | 6,4 | 29,6 | 330,6  | 30,4 | 7  | b       |
| PF#1512 | none Protein of unknown function 5.2 Protein of unknown function similar to proteins from other organisms                                                            | 5,0 | 64,0 | 87,8   | 2,0  | 1  | c       |
| PF#1514 | Methylmalonyl-CoA epimerase 2.1.1 Specific carbohydrate metabolic pathway                                                                                            | 5,4 | 16,7 | 475,8  | 85,1 | 9  | a, b, c |
| PF#1515 | trx Thioredoxin 3.8 Protein modification                                                                                                                             | 4,7 | 34,0 | 449,3  | 32,7 | 6  | a, b, c |
| PF#1516 | pgm1 Phosphoglucomutase 2.1.2 Main glycolytic pathways                                                                                                               | 5,0 | 58,6 | 280,2  | 13,1 | 4  | a, b, c |
| PF#1521 | rplY Ribosomal protein L25 3.7.1 Ribosomal proteins                                                                                                                  | 4,4 | 23,5 | 186,1  | 23,7 | 4  | c       |
| PF#1523 | glmU UDP-N-acetylglucosamine pyrophosphorylase 2.3 Metabolism of nucleotides and nucleic acids                                                                       | 5,1 | 54,5 | 134,2  | 8,2  | 4  | a       |
| PF#1536 | galK Galactokinase 2.1.1 Specific carbohydrate metabolic pathway                                                                                                     | 5,6 | 41,9 | 751,6  | 49,7 | 13 | a, b    |
| PF#1541 | gdh glutamate dehydrogenase (NAD(P)-glutamate dehydrogenase) 2.2 Metabolism of amino acids and related molecules                                                     | 5,5 | 48,9 | 353,7  | 18,1 | 6  | b       |
| PF#1547 | none Protein of unknown function 5.2 Protein of unknown function similar to proteins from other organisms                                                            | 5,7 | 68,7 | 77,9   | 3,1  | 2  | b, c    |
| PF#1556 | ll                                                                                                                                                                   | 5,2 | 37,3 | 46,1   | 2,4  | 1  | c       |
| PF#1571 | tuf Elongation factor Tu 3.7.4 Translation elongation                                                                                                                | 5,0 | 43,7 | 1691,1 | 78,8 | 27 | a, b, c |
| PF#1587 | pta Phosphate acetyltransferase  2.1 Metabolism of carbohydrates and related molecules                                                                               | 4,7 | 52,8 | 224,2  | 10,4 | 4  | b, c    |
| PF#1588 | ackA Acetate kinase 2.2 Metabolism of amino acids and related molecules                                                                                              | 5,4 | 42,4 | 1134,4 | 60,9 | 20 | a, b, c |



|         |                                                                                                                                                                                 |     |       |        |      |    |         |
|---------|---------------------------------------------------------------------------------------------------------------------------------------------------------------------------------|-----|-------|--------|------|----|---------|
| PF#1601 | glf , rfb UDP-galactopyranose mutase 1.1 Cell wall                                                                                                                              | 5,3 | 45,3  | 756,2  | 41,5 | 13 | a       |
| PF#1602 | none ABC transporter 1.2.1 Transport/binding of proteins/peptides                                                                                                               | 5,0 | 64,8  | 173,0  | 8,5  | 4  | a       |
| PF#1612 | none Protein of unknown function 5.2 Protein of unknown function similar to proteins from other organisms                                                                       | 6,6 | 10,7  | 90,6   | 20,2 | 1  | c       |
| PF#1630 | ldh lactate dehydrogenase 2.1.2 Main glycolytic pathways                                                                                                                        | 4,9 | 34,1  | 169,5  | 16,5 | 3  | b       |
| PF#1637 | pf1637 Putative carboxylic ester hydrolase 2.4 Metabolism of lipids                                                                                                             | 5,0 | 32,1  | 326,5  | 39,9 | 7  | b       |
| PF#1640 | trxA2 Thioredoxin 3.8 Protein modification                                                                                                                                      | 9,1 | 15,2  | 73,1   | 11,3 | 1  | c       |
| PF#1652 | ugpA UTP--glucose-1-phosphate uridylyltransferase 2.1 Metabolism of carbohydrates and related molecules                                                                         | 4,9 | 49,9  | 281,6  | 12,3 | 5  | b       |
| PF#1653 |                                                                                                                                                                                 | 4,7 | 11,9  | 85,2   | 15,5 | 1  | c       |
| PF#1655 | pf1655 Carboxylic ester hydrolase 2.4 Metabolism of lipids                                                                                                                      | 4,6 | 29,4  | 321,7  | 25,7 | 6  | b       |
| PF#1658 | trx Thiol-disulfide isomerase 3.8 Protein modification                                                                                                                          | 4,2 | 12,2  | 65,9   | 9,9  | 1  | c       |
| PF#1659 | dtxR Iron-dependent repressor 3.5.2 Transcription regulation                                                                                                                    | 4,8 | 24,7  | 46,0   | 6,2  | 1  | c       |
| PF#1671 | Sua5_yciO_yrdC 3.7.3 Translation initiation                                                                                                                                     | 5,1 | 22,6  | 141,5  | 10,7 | 2  | b       |
| PF#1673 | pfp (pfk) pyrophosphate phosphofructokinase 2.1 Metabolism of carbohydrates and related molecules                                                                               | 4,9 | 43,2  | 466,7  | 20,8 | 6  | a, b, c |
| PF#1718 | gabT 4-aminobutyrate aminotransferase 2.2 Metabolism of amino acids and related molecules                                                                                       | 5,3 | 46,7  | 639,3  | 30,3 | 10 | a, b, c |
| PF#1721 | prfB Peptide chain release factor 2 (RF-2) 3.7.6 Nonribosomal protein synthesis                                                                                                 | 4,6 | 41,0  | 74,0   | 4,6  | 1  | c       |
| PF#1733 | ribosomal S30AE, sigma 54 modulation protein 3.7.3 Translation initiation                                                                                                       | 7,9 | 22,0  | 141,8  | 12,1 | 2  | c       |
| PF#1734 | Preprotein translocase SecA subunit 1.2 Transport/binding proteins and lipoproteins                                                                                             | 4,9 | 106,5 | 79,7   | 2,3  | 2  | a, b, c |
| PF#1737 |                                                                                                                                                                                 | 4,6 | 7,2   | 74,7   | 26,9 | 1  | c       |
| PF#1738 | protein of unknown function 5.2 Protein of unknown function similar to proteins from other organisms                                                                            | 5,4 | 17,2  | 130,6  | 22,8 | 2  | b       |
| PF#1739 | PPA1328 Predicted metal-dependent phosphoesterase                                                                                                                               | 6,0 | 31,1  | 133,7  | 14,0 | 3  | b       |
| PF#1740 | trpS Tryptophanyl-tRNA synthetase 3.7.2 Aminoacyl-tRNA synthetases                                                                                                              | 5,4 | 40,8  | 421,9  | 23,1 | 8  | a, b    |
| PF#1746 | ipa Dihydropyridyl dehydrogenase (E3 component of alpha keto acid dehydrogenase complexes) (Dihydropyridyl dehydrogenase) 2.1 Metabolism of carbohydrates and related molecules | 5,1 | 49,6  | 1728,0 | 72,5 | 30 | a, b, c |
| PF#1747 | braC Leucine-, isoleucine-, valine-, threonine-, and alanine-binding protein [Precursor] (LIVAT-BP) 1.2.5 Transport/binding of amino-acids                                      | 6,1 | 40,8  | 80,9   | 8,3  | 2  | a       |
| PF#1753 | transcriptional regulator 3.5.2 Transcription regulation                                                                                                                        | 6,1 | 23,4  | 96,5   | 15,3 | 2  | b       |
| PF#1760 | gatB Aspartyl/glutamyl-tRNA(Asn/Gln) amidotransferase subunit B (Asp/Glu-ADT subunit B) 3.7 Protein synthesis                                                                   | 5,0 | 54,8  | 234,3  | 10,1 | 3  | b, c    |
| PF#1761 | gatA Glutamyl-tRNA(Gln) amidotransferase subunit A (Glu-ADT subunit A) 3.7 Protein synthesis                                                                                    | 4,8 | 53,0  | 161,7  | 7,1  | 2  | b, c    |
| PF#1763 | Amino acid-binding ACT 3.8 Protein modification                                                                                                                                 | 4,7 | 22,8  | 68,2   | 11,5 | 2  | b       |
| PF#1774 | tyrS Tyrosyl-tRNA synthetase (Tyrosine--tRNA ligase) (TyrRS) 3.7.2 Aminoacyl-tRNA synthetases                                                                                   | 5,7 | 46,0  | 649,4  | 41,9 | 11 | a, b, c |
| PF#1778 | none S-layer protein  1.1 Cell wall                                                                                                                                             | 4,8 | 50,5  | 112,9  | 5,4  | 3  | a       |
| PF#1819 | hisD Histidinol dehydrogenase (HDH) 2.2 Metabolism of amino acids and related molecules                                                                                         | 5,0 | 46,2  | 235,5  | 11,4 | 3  | b       |
| PF#1825 | protein of unknown function 5.2 Protein of unknown function similar to proteins from other organisms                                                                            | 4,6 | 29,0  | 101,0  | 6,8  | 1  | c       |
| PF#1838 | outer membrane protein of unknown function  1.1 Cell wall                                                                                                                       | 4,8 | 47,8  | 232,7  | 8,5  | 4  | a       |
| PF#1854 |                                                                                                                                                                                 | 4,2 | 18,4  | 52,4   | 8,9  | 1  | c       |
| PF#1861 | pf1861 Putative carboxylic ester hydrolase 2.4 Metabolism of lipids                                                                                                             | 5,9 | 116,7 | 250,6  | 7,2  | 6  | b       |
| PF#1876 | Secreted protease with a PDZ domain 3.10 Protein degradation                                                                                                                    | 4,6 | 36,3  | 73,8   | 3,5  | 1  | a       |

|         |                                                                                                                                                                                                                                                           |     |      |        |      |    |         |
|---------|-----------------------------------------------------------------------------------------------------------------------------------------------------------------------------------------------------------------------------------------------------------|-----|------|--------|------|----|---------|
| PF#1882 | pip1 Proline iminopeptidase 3.10 Protein degradation                                                                                                                                                                                                      | 5,3 | 45,5 | 613,1  | 41,3 | 12 | a, b    |
| PF#1885 | ABC transporter, substrate binding protein 1.2.5 Transport/binding of amino-acids                                                                                                                                                                         | 5,0 | 54,9 | 890,4  | 33,5 | 15 | a, b    |
| PF#1890 | serA D-3-phosphoglycerate dehydrogenase / erythronate 4-phosphate dehydrogenase 2.5 Metabolism of coenzymes and prosthetic groups                                                                                                                         | 6,1 | 42,6 | 236,4  | 17,9 | 5  | b       |
| PF#1909 | zinc-binding dehydrogenase 4.6 Miscellaneous                                                                                                                                                                                                              | 5,4 | 37,1 | 839,5  | 47,0 | 12 | a, b    |
| PF#1915 | bccA Acetyl-/propionyl-coenzyme A carboxylase alpha chain  2.4 Metabolism of lipids                                                                                                                                                                       | 5,0 | 63,4 | 73,3   | 3,0  | 2  | a       |
| PF#1933 | transcriptional regulator TetR family 3.5.2 Transcription regulation                                                                                                                                                                                      | 5,9 | 21,1 | 56,6   | 7,2  | 1  | c       |
| PF#1944 | pdxS Pyridoxal biosynthesis lyase pdxS 2.5 Metabolism of coenzymes and prosthetic groups                                                                                                                                                                  | 5,1 | 31,3 | 354,3  | 25,0 | 5  | b, c    |
| PF#1946 | zwf Glucose-6-phosphate 1-dehydrogenase 2.1.2 Main glycolytic pathways                                                                                                                                                                                    | 6,0 | 60,3 | 235,4  | 8,9  | 4  | b       |
| PF#1947 | opcA Glucose 6-phosphate dehydrogenase effector OpcA 2.1.2 Main glycolytic pathways                                                                                                                                                                       | 5,4 | 32,2 | 156,8  | 17,7 | 4  | b       |
| PF#1951 | tpi1 triosephosphate isomerase 1  2.1.2 Main glycolytic pathways                                                                                                                                                                                          | 5,1 | 27,6 | 421,7  | 39,7 | 7  | b, c    |
| PF#1952 | pgk Phosphoglycerate kinase 2.1.2 Main glycolytic pathways                                                                                                                                                                                                | 5,2 | 42,4 | 471,9  | 24,8 | 8  | a, b, c |
| PF#1964 | ABC transporter, ATP-binding protein 1.2 Transport/binding proteins and lipoproteins                                                                                                                                                                      | 5,4 | 31,6 | 86,7   | 7,2  | 2  | b       |
| PF#1971 | uvrB UvrABC system protein B (Protein uvrB) (Excinuclease ABC subunit B) 3.2 DNA restriction and modification (and repair)                                                                                                                                | 5,0 | 78,3 | 144,2  | 5,9  | 3  | b       |
| PF#2003 | none Protein of unknown function 5.2 Protein of unknown function similar to proteins from other organisms                                                                                                                                                 | 5,6 | 36,7 | 464,5  | 28,2 | 8  | a, b    |
| PF#2005 | bkdA2 2-oxoisovalerate dehydrogenase subunit beta (EC 1.2.4.4) (Branched- chain alpha-keto acid dehydrogenase E1 component beta chain) (BCKDH E1-beta) Pyruvate dehydrogenase E1 component subunit beta  2.2 Metabolism of amino acids and related molecu | 5,3 | 35,6 | 123,2  | 12,7 | 3  | b       |
| PF#2006 | bkdA1 2-oxoisovalerate dehydrogenase subunit alpha (Branched- chain alpha-keto acid dehydrogenase E1 component alpha chain) (BCKDH E1-alpha) 2.2 Metabolism of amino acids and related molecules                                                          | 4,6 | 40,5 | 363,9  | 19,2 | 6  | b, c    |
| PF#2042 | pf2042 Putative carboxylic ester hydrolase 2.4 Metabolism of lipids                                                                                                                                                                                       | 4,6 | 35,2 | 216,0  | 23,4 | 4  | b       |
| PF#2048 | cypA (yjiB) Cytochrome P450 (Heme-thiolate monooxygenase) 1.4 Membrane bioenergetics (electron transport chain and ATP synthase)                                                                                                                          | 4,8 | 44,2 | 1175,6 | 58,7 | 20 | a, b, c |
| PF#2054 | mrc/ponA penicillin-binding protein (□peptidoglycan glycosyltransferase) 1.1 Cell wall                                                                                                                                                                    | 7,7 | 75,3 | 67,0   | 2,3  | 1  | a       |
| PF#2061 | slh Polysaccharide deacetylase precursor (S-layer domain protein) 1.1 Cell wall                                                                                                                                                                           | 6,0 | 12,4 | 448,6  | 96,4 | 8  | a, b    |
| PF#2062 | inlA Internalin protein 1.1 Cell wall                                                                                                                                                                                                                     | 5,1 | 72,5 | 2382,5 | 75,2 | 31 | a, b    |
| PF#2074 | hypothetical secreted protein 6 Protein of unknown function, without similarity to other proteins                                                                                                                                                         | 6,7 | 30,0 | 211,9  | 11,8 | 3  | a       |
| PF#2085 | Phosphoribosyltransferase/nitroreductase (fusion gene) (Nicotinate-nucleotide-dimethylbenzimidazole phosphoribosyltransferase) 2.5 Metabolism of coenzymes and prosthetic groups                                                                          | 5,1 | 66,4 | 846,6  | 35,0 | 16 | a       |
| PF#2086 | pepC Amino peptidase C, Bleomycin hydrolase,  3.10 Protein degradation                                                                                                                                                                                    | 4,7 | 53,4 | 80,9   | 4,4  | 1  | c       |
| PF#2091 | opuCA Glycine betaine/carnitine/choline transport ATP-binding protein opuCA 1.2.5 Transport/binding of amino-acids                                                                                                                                        | 5,5 | 48,0 | 593,0  | 30,0 | 10 | a, b, c |
| PF#2094 | groS1(groES1) (hsp10) 10 kDa chaperonin 1 (Protein Cpn10 1) (groES protein 1) (Heat shock 10 1) 3.9 Protein folding                                                                                                                                       | 4,9 | 10,6 | 374,3  | 63,3 | 5  | a, b, c |
| PF#2096 | guaB Inosine-5 -monophosphate dehydrogenase (IMP dehydrogenase) (IMPDH) (IMPD) / GMP reductase 2.3 Metabolism of nucleotides and nucleic acids                                                                                                            | 5,5 | 53,9 | 289,6  | 13,4 | 4  | b       |
| PF#2097 | guaB1 Inosine-5 -monophosphate dehydrogenase Inosine-5 -monophosphate dehydrogenase (IMP dehydrogenase) (IMPDH) (IMPD) / GMP reductase 2.3 Metabolism of nucleotides and nucleic acids                                                                    | 5,6 | 39,5 | 837,4  | 52,9 | 12 | a, b    |
| PF#2105 | cys1 Cysteine synthase 1 2.2 Metabolism of amino acids and related molecules                                                                                                                                                                              | 5,1 | 31,7 | 290,8  | 23,7 | 4  | b       |
| PF#2129 | Phospholipase D/Transphosphatidylase 2.4 Metabolism of lipids                                                                                                                                                                                             | 9,9 | 47,4 | 67,6   | 1,7  | 1  | a       |
| PF#2133 | purH Phosphoribosylaminoimidazolecarboxamide formyltransferase (AICAR transformylase) 2.3 Metabolism of nucleotides and nucleic acids                                                                                                                     | 5,4 | 54,5 | 1095,2 | 58,2 | 19 | a       |
| PF#2148 | protein of unknown function 5.2 Protein of unknown function similar to proteins from other organisms                                                                                                                                                      | 4,9 | 23,2 | 102,9  | 16,0 | 3  | b       |

|         |                                                                                                                                                                                                            |      |       |        |      |    |         |
|---------|------------------------------------------------------------------------------------------------------------------------------------------------------------------------------------------------------------|------|-------|--------|------|----|---------|
| PF#2152 | asd Aspartate-semialdehyde dehydrogenase (Semialdehyde dehydrogenase) 2.2 Metabolism of amino acids and related molecules                                                                                  | 5,2  | 36,6  | 417,3  | 26,7 | 6  | b, c    |
| PF#2153 | lDelta 1-pyrroline-5-carboxylate reductase 2.2 Metabolism of amino acids and related molecules                                                                                                             | 5,1  | 28,9  | 97,4   | 10,5 | 2  | b       |
| PF#2170 | IGCN5-related N-acetyltransferase 4.6 Miscellaneous                                                                                                                                                        | 5,5  | 34,3  | 147,9  | 15,7 | 3  | b       |
| PF#2174 | inositol-1-phosphate synthase 2.1.1 Specific carbohydrate metabolic pathway                                                                                                                                | 4,8  | 39,2  | 933,3  | 63,2 | 16 | a, b, c |
| PF#2198 | galK Galactokinase 2.1.1 Specific carbohydrate metabolic pathway                                                                                                                                           | 5,0  | 41,0  | 111,4  | 7,8  | 2  | b       |
| PF#2200 | nadB L-aspartate oxidase 2.2 Metabolism of amino acids and related molecules                                                                                                                               | 5,2  | 54,7  | 261,5  | 13,6 | 6  | a, b    |
| PF#2204 | cysN Sulfate adenylyltransferase, large subunit/ ATP-sulfurylase, subunit 1 (ATP:sulfate adenylyltransferase) 2.7 Metabolism of sulfur                                                                     | 4,7  | 48,1  | 510,9  | 28,7 | 7  | b       |
| PF#2206 | cysH Putative phosphoadenosine phosphosulfate reductase 2.7 Metabolism of sulfur                                                                                                                           | 4,9  | 28,1  | 186,8  | 11,2 | 2  | b       |
| PF#2211 | cysA Sulfate/thiosulfate import ATP-binding protein CysA (Sulfate-transporting ATPase) 2.7 Metabolism of sulfur                                                                                            | 5,3  | 37,9  | 248,4  | 18,6 | 5  | b       |
| PF#2215 | pntA NAD(P) transhydrogenase subunit alpha (Pyridine nucleotide transhydrogenase subunit alpha) (Nicotinamide nucleotide transhydrogenase subunit alpha) 2.5 Metabolism of coenzymes and prosthetic groups | 5,4  | 54,2  | 284,9  | 14,3 | 6  | c       |
| PF#2237 | lPyridine nucleotide-disulphide oxidoreductase 4.6 Miscellaneous                                                                                                                                           | 4,9  | 48,2  | 409,6  | 25,5 | 7  | b, c    |
| PF#2241 | galE UDP-glucose 4-epimerase 2.1.4 Substrate-specific entries to carbohydrate metabolic pathway                                                                                                            | 4,8  | 35,8  | 102,1  | 14,2 | 3  | b       |
| PF#2252 | caiA Crotonobetainyl-CoA dehydrogenase (Crotonobetainyl-CoA reductase) 2.4 Metabolism of lipids                                                                                                            | 4,9  | 42,7  | 119,1  | 10,1 | 3  | b       |
| PF#2276 | sseB Thiosulfate sulfurtransferase  1.2.3 Transport/binding of inorganic ions                                                                                                                              | 5,1  | 29,0  | 250,7  | 19,1 | 3  | b       |
| PF#2282 | caiC Acyl-CoA synthase 2.4 Metabolism of lipids                                                                                                                                                            | 5,1  | 61,0  | 296,1  | 10,6 | 5  | b       |
| PF#2291 | lserine/threonine protein kinase 2.2 Metabolism of amino acids and related molecules                                                                                                                       | 4,9  | 74,0  | 52,3   | 2,0  | 1  | a       |
| PF#2293 | jag Single-stranded nucleic acid binding R3H                                                                                                                                                               | 3,9  | 33,8  | 305,8  | 24,1 | 6  | c       |
| PF#2295 | lmembrane protein (s-layer) 1.1 Cell wall                                                                                                                                                                  | 4,9  | 59,3  | 56,6   | 1,6  | 1  | a, b    |
| PF#2307 | ald Alanine dehydrogenase 1.1 Cell wall                                                                                                                                                                    | 4,8  | 39,4  | 1088,7 | 56,3 | 19 | a, b, c |
| PF#2315 | gpsA Glycerol-3-phosphate dehydrogenase [NAD(P)+] (NAD(P)H-dependent glycerol-3-phosphate dehydrogenase) 2.4 Metabolism of lipids                                                                          | 5,0  | 36,1  | 99,3   | 7,1  | 2  | b       |
| PF#2316 | xylB Xylulokinase protein, Carbohydrate kinase 2.1 Metabolism of carbohydrates and related molecules                                                                                                       | 5,2  | 55,4  | 266,8  | 12,9 | 5  | a       |
| PF#2342 | lacZ Beta-galactosidase (Lactase) LacZ 2.1.1 Specific carbohydrate metabolic pathway                                                                                                                       | 4,9  | 114,5 | 401,6  | 10,0 | 9  | a       |
| PF#2346 | fixA (ydiQ) Electron transfer flavoprotein (FixA protein) 1.4 Membrane bioenergetics (electron transport chain and ATP synthase)                                                                           | 4,7  | 25,7  | 83,4   | 6,0  | 2  | b       |
| PF#2369 | PF2369 Putative aldo/keto reductase (oxidoreductase) 4.6 Miscellaneous                                                                                                                                     | 5,5  | 31,2  | 802,1  | 67,6 | 15 | a, b    |
| PF#2370 | actA Coenzyme A transferase (Putative succinyl-CoA or butyryl-CoA:coenzyme A transferase) 2.4 Metabolism of lipids                                                                                         | 5,5  | 55,7  | 1944,3 | 74,6 | 35 | a, c    |
| PF#2381 | purB Adenylosuccinate lyase 2.3 Metabolism of nucleotides and nucleic acids                                                                                                                                | 5,5  | 51,9  | 114,8  | 9,2  | 2  | b       |
| PF#2397 | pgi, PPA2131 Glucose-6-phosphate isomerase (EC 5.3.1.9) (GPI) (Phosphoglucose isomerase) (PGI) (Phosphohexose isomerase) (PHI) 2.1.2 Main glycolytic pathways                                              | 5,2  | 61,8  | 509,8  | 24,5 | 11 | a, b    |
| PF#2402 | lNADH-flavin reductase 2.5 Metabolism of coenzymes and prosthetic groups                                                                                                                                   | 5,0  | 21,6  | 83,6   | 12,3 | 2  | b       |
| PF#2412 | nuoG NADH dehydrogenase I chain G 1.4 Membrane bioenergetics (electron transport chain and ATP synthase)                                                                                                   | 5,1  | 84,9  | 308,5  | 8,7  | 5  | b, c    |
| PF#2413 | lABC transporter ATP-binding protein 1.2 Transport/binding proteins and lipoproteins                                                                                                                       | 5,2  | 25,0  | 78,6   | 9,3  | 2  | b, c    |
| PF#2416 | pf2416 Protein of unknown function 5.2 Protein of unknown function similar to proteins from other organisms                                                                                                | 6,4  | 28,5  | 92,8   | 9,6  | 2  | b       |
| PF#2419 | tal1 Transaldolase 1 2.1.2 Main glycolytic pathways                                                                                                                                                        | 4,8  | 38,0  | 528,4  | 28,1 | 6  | b       |
| PF#2423 | ahpF Alkyl hydroperoxide reductase subunit F 4.2 Detoxification                                                                                                                                            | 4,9  | 59,9  | 140,7  | 8,5  | 3  | b       |
| PF#2424 | rpsG 30S ribosomal protein S7 3.7.1 Ribosomal proteins                                                                                                                                                     | 10,3 | 17,4  | 378,4  | 64,1 | 8  | c       |

|         |                                                                                                                                                                                                           |     |      |        |      |    |         |
|---------|-----------------------------------------------------------------------------------------------------------------------------------------------------------------------------------------------------------|-----|------|--------|------|----|---------|
| PF#2426 | rpsJ 30S ribosomal protein S10 3.7.1 Ribosomal proteins                                                                                                                                                   | 9,6 | 11,7 | 159,1  | 32,0 | 3  | c       |
| PF#2442 | tolD tolD (Myo-inositol catabolism tolD protein) (acetolactate synthase protein) (pyruvate:pyruvate acetaldehydetransferase (decarboxylating)) 2.1.1 Specific carbohydrate metabolic pathway              | 5,0 | 69,8 | 803,8  | 35,0 | 16 | a, b    |
| PF#2444 | clpB 1 Chaperone clpB 1 (ATP-dependent Clp protease B1) (Clp chaperone) 3.9 Protein folding                                                                                                               | 5,1 | 93,5 | 2980,8 | 66,6 | 50 | a, b, c |
| PF#2463 | pstS Phosphate-binding transport protein of ABC transporter system 1.2.3 Transport/binding of inorganic ions                                                                                              | 5,1 | 36,5 | 114,3  | 7,7  | 2  | a       |
| PF#2478 | mao flavin-containing amine oxidase 2.2 Metabolism of amino acids and related molecules                                                                                                                   | 5,3 | 48,3 | 92,1   | 7,6  | 2  | b       |
| PF#2494 | ribAB GTP cyclohydrolase II protein, Riboflavin biosynthesis protein 2.5 Metabolism of coenzymes and prosthetic groups                                                                                    | 5,5 | 50,9 | 166,6  | 6,5  | 2  | b       |
| PF#2500 | mmcV cysD Sulfate adenyltransferase subunit 2 (Sulfate adenylate transferase) (SAT) (ATP-sulfurylase small subunit) (Mitomycin biosynthesis protein V) 2.7 Metabolism of sulfur                           | 5,2 | 39,3 | 130,8  | 10,7 | 2  | b       |
| PF#2521 | araB, xylB ? Carbohydrate kinase 2.1.1 Specific carbohydrate metabolic pathway                                                                                                                            | 5,0 | 56,5 | 90,5   | 5,0  | 2  | a       |
| PF#2531 | malY Bifunctional PLP-dependent enzyme with beta-cystathionase and maltose regulon repressor activities (cystathionine beta-lyase, CBL) 2.2 Metabolism of amino acids and related molecules               | 4,9 | 45,0 | 379,6  | 18,9 | 5  | b       |
| PF#2535 | thiE thiamine-phosphate diphosphorylase 2.5 Metabolism of coenzymes and prosthetic groups                                                                                                                 | 5,8 | 23,2 | 99,3   | 16,3 | 2  | b       |
| PF#2552 | none nucleoside-diphosphate-sugar epimerases 1.1 Cell wall                                                                                                                                                | 5,3 | 27,7 | 82,4   | 8,2  | 1  | c       |
| PF#2566 | degQ Trypsin-like serine protease 1.2.1 Transport/binding of proteins/peptides                                                                                                                            | 5,3 | 28,7 | 91,3   | 7,2  | 2  | a       |
| PF#2570 | ll                                                                                                                                                                                                        | 5,3 | 26,7 | 126,8  | 19,6 | 3  | a       |
| PF#2571 | clpB 2 Chaperone clpB 2 (ATP-dependent Clp protease B2) (Clp chaperone) 3.9 Protein folding                                                                                                               | 5,3 | 94,3 | 2229,2 | 54,7 | 39 | a, b, c |
| PF#2579 | groL2 (groEL2) (hsp60) 60 kDa chaperonin 2 (Protein Cpn60 2) (groEL protein 2) (Heat shock protein 60 2) 3.9 Protein folding                                                                              | 4,7 | 56,5 | 857,5  | 33,3 | 13 | a, b, c |
| PF#2582 | liron-sulfur protein 1.4 Membrane bioenergetics (electron transport chain and ATP synthase)                                                                                                               | 6,7 | 57,3 | 574,4  | 23,4 | 8  | b, c    |
| PF#2583 | lOxidoreductase 4.6 Miscellaneous                                                                                                                                                                         | 5,6 | 28,9 | 803,3  | 62,8 | 15 | a, b, c |
| PF#2590 | hemE Uroporphyrinogen decarboxylase 2.5 Metabolism of coenzymes and prosthetic groups                                                                                                                     | 5,4 | 66,1 | 152,0  | 7,9  | 3  | b       |
| PF#2596 | dld d-lactate dehydrogenase 2.1 Metabolism of carbohydrates and related molecules                                                                                                                         | 5,7 | 63,7 | 519,4  | 23,8 | 9  | b, c    |
| PF#2605 | maoC MaoC acyl dehydratase 2.4 Metabolism of lipids                                                                                                                                                       | 5,4 | 32,9 | 98,0   | 7,9  | 2  | b       |
| PF#2629 | tig Trigger factor (TF) 3.9 Protein folding                                                                                                                                                               | 4,6 | 57,4 | 274,8  | 15,4 | 5  | b, c    |
| PF#2642 | lDSBA-like thioredoxin 4.6 Miscellaneous                                                                                                                                                                  | 4,8 | 23,0 | 227,9  | 30,4 | 5  | b       |
| PF#2654 | orn Oligoribonuclease 3.6 RNA modification                                                                                                                                                                | 4,8 | 24,8 | 99,8   | 12,6 | 2  | b, c    |
| PF#2657 | mutB Methylmalonyl-CoA mutase large subunit (Methylmalonyl-CoA mutase alpha subunit) (MCM-alpha) (MUT B-(R)-2-Methyl-3-oxopropanoyl-CoA CoA-carbonylmutase) 2.1.1 Specific carbohydrate metabolic pathway | 5,2 | 80,2 | 1332,7 | 44,1 | 20 | a, b, c |
| PF#2658 | mutA Methylmalonyl-CoA mutase small subunit (Methylmalonyl-CoA mutase beta subunit) (MCB-beta) 2.1.1 Specific carbohydrate metabolic pathway                                                              | 5,0 | 69,6 | 1690,3 | 57,5 | 31 | a, b, c |
| PF#2671 | icd Putative isocitrate/isopropylmalate dehydrogenase 2.1.3 TCA cycle                                                                                                                                     | 5,2 | 44,8 | 742,9  | 47,2 | 15 | a, b, c |
| PF#2675 | metG Methionyl-tRNA synthetase (Methionine--tRNA ligase) (MetRS) 3.7.2 Aminoacyl-tRNA synthetases                                                                                                         | 4,7 | 62,6 | 181,4  | 8,4  | 4  | b       |
| PF#2684 | guaA GMP synthase [glutamine-hydrolyzing] (Glutamine amidotransferase) (GMP synthetase) 2.3 Metabolism of nucleotides and nucleic acids                                                                   | 4,9 | 55,6 | 257,6  | 12,6 | 4  | b       |
| PF#2691 | groL1 (groEL1) 60 kDa chaperonin 1 (Protein Cpn60 1) (groEL protein 1) (Heat shock protein 60 1) 3.9 Protein folding                                                                                      | 4,7 | 56,1 | 1010,4 | 48,7 | 15 | a, b, c |
| PF#2698 | rspi 30S ribosomal protein S9 3.7.1 Ribosomal proteins                                                                                                                                                    | 9,9 | 19,5 | 258,6  | 43,2 | 5  | c       |
| PF#2700 | rpoA DNA-directed RNA polymerase alpha chain (RNAP alpha subunit) (Transcriptase alpha chain) (RNA polymerase subunit alpha) 3.5.3 Transcription elongation                                               | 4,4 | 37,0 | 391,2  | 38,6 | 8  | b, c    |
| PF#2701 | sodA Iron/Manganese superoxide dismutase (Superoxide dismutase [Mn/Fe]) (SODM) 4.2 Detoxification                                                                                                         | 5,3 | 22,8 | 1122,3 | 71,3 | 22 | a, b, c |
| PF#2703 | lABC transporter, ATPase subunit 1.2 Transport/binding proteins and lipoproteins                                                                                                                          | 5,6 | 75,4 | 69,7   | 2,9  | 2  | b       |

|         |                                                                                                                                                                           |     |       |        |      |    |         |
|---------|---------------------------------------------------------------------------------------------------------------------------------------------------------------------------|-----|-------|--------|------|----|---------|
| PF#2708 | citE Citrate lyase beta chain (Citrase beta chain) (Citrate(Pro-3S)-lyase beta chain) 2.1.3 TCA cycle                                                                     | 5,2 | 31,1  | 85,8   | 7,3  | 2  | c       |
| PF#2722 | none Response regulator receiver protein 3.5.2 Transcription regulation                                                                                                   | 4,9 | 18,8  | 97,8   | 20,1 | 2  | b, c    |
| PF#2723 | guaB Inosine monophosphate dehydrogenase 2.3 Metabolism of nucleotides and nucleic acids                                                                                  | 6,0 | 51,7  | 249,6  | 16,8 | 4  | b       |
| PF#2727 | ftsZ Cell division protein FtsZ 1.7 Cell division                                                                                                                         | 4,5 | 42,8  | 304,2  | 19,6 | 4  | b, c    |
| PF#2730 | murF UDP-N-acetylmuramoyl-tripeptide--D-alanyl-D-alanine ligase (UDP- MurNAc-pentapeptide synthetase) (D-alanyl-D-alanine-adding enzyme) 1.1 Cell wall                    | 5,8 | 52,0  | 335,0  | 12,9 | 5  | b       |
| PF#2732 | ftsI Cell division protein FtsI (penicillin-binding protein 2) (Peptidoglycan glycosyltransferase) 1.1 Cell wall                                                          | 4,9 | 65,6  | 139,3  | 7,7  | 3  | a       |
| PF#2734 | infB Translation initiation factor IF-2 3.7 Protein synthesis                                                                                                             | 9,0 | 101,8 | 50,3   | 1,5  | 1  | c       |
| PF#2738 | tsf Elongation factor Ts (EF-Ts) 3.7.4 Translation elongation                                                                                                             | 4,8 | 28,9  | 317,8  | 22,2 | 4  | b, c    |
| PF#2739 | fabG 3-oxoacyl-[acyl-carrier protein] reductase 2.4 Metabolism of lipids                                                                                                  | 5,6 | 25,6  | 81,2   | 6,6  | 1  | c       |
| PF#2740 | ldh Dehydrogenase 4.6 Miscellaneous                                                                                                                                       | 5,0 | 25,3  | 141,9  | 15,3 | 3  | b       |
| PF#2741 | sufS Cysteine desulphurases, SufS 1.2 Transport/binding proteins and lipoproteins                                                                                         | 5,4 | 45,2  | 683,1  | 39,2 | 13 | a, b, c |
| PF#2743 | sufB FeS assembly protein SufB                                                                                                                                            | 5,0 | 53,9  | 125,2  | 7,4  | 3  | c       |
| PF#2745 | pdxT Glutamine amidotransferase subunit pdxT (Glutamine amidotransferase glutaminase subunit pdxT) 2.5 Metabolism of coenzymes and prosthetic groups                      | 5,8 | 21,2  | 171,8  | 15,5 | 2  | b       |
| PF#2748 | gap Glyceraldehyde-3-phosphate dehydrogenase / erythrose 4 phosphate dehydrogenase 2.5 Metabolism of coenzymes and prosthetic groups                                      | 5,3 | 36,1  | 1942,4 | 84,1 | 29 | a, b, c |
| PF#2757 | sdhB3 Succinate dehydrogenase iron-sulfur protein 1.4 Membrane bioenergetics (electron transport chain and ATP synthase)                                                  | 5,6 | 27,1  | 981,9  | 78,0 | 16 | a, b, c |
| PF#2758 | sdhA3 Succinate dehydrogenase flavoprotein subunit 2.1.3 TCA cycle                                                                                                        | 6,0 | 74,8  | 540,3  | 19,6 | 12 | a, b, c |
| PF#2761 | none Protein of unknown function 5.2 Protein of unknown function similar to proteins from other organisms                                                                 | 8,6 | 9,5   | 97,1   | 27,4 | 1  | c       |
| PF#2762 | rpsP 30S ribosomal protein S16 3.7.1 Ribosomal proteins                                                                                                                   | 8,7 | 17,7  | 100,3  | 21,5 | 2  | c       |
| PF#2764 | ffh GTP binding signal recognition particle protein 3.9 Protein folding                                                                                                   | 9,1 | 56,2  | 71,8   | 3,1  | 1  | c       |
| PF#2785 | ilvC Ketol-acid reductoisomerase (Acetohydroxy-acid isomeroreductase) (Alpha-keto-beta-hydroxylacil reductoisomerase) 2.2 Metabolism of amino acids and related molecules | 5,0 | 37,2  | 226,7  | 19,2 | 4  | b, c    |
| PF#2789 | leuC 3-isopropylmalate dehydratase large subunit (Isopropylmalate isomerase) (Alpha-IPM isomerase) (IPMI) 2.2 Metabolism of amino acids and related molecules             | 5,4 | 49,4  | 133,9  | 9,7  | 3  | b       |
| PF#2791 | nrdJ Vitamin B12-dependent ribonucleotide reductase (Ribonucleoside-diphosphate reductase NrdJ) 2.3 Metabolism of nucleotides and nucleic acids                           | 4,9 | 104,8 | 92,6   | 2,4  | 2  | a       |
| PF#2806 | acn Aconitase, Aconitate hydratase 2.1.3 TCA cycle                                                                                                                        | 4,9 | 96,3  | 1629,4 | 42,5 | 31 | a, b, c |
| PF#2818 | none Protein of unknown function 5.2 Protein of unknown function similar to proteins from other organisms                                                                 | 5,3 | 25,8  | 55,6   | 7,8  | 1  | a       |
| PF#2825 | aroE Shikimate 5-dehydrogenase 2.2 Metabolism of amino acids and related molecules                                                                                        | 5,0 | 29,1  | 57,8   | 6,6  | 1  | b       |
| PF#2832 | sdhA Succinate dehydrogenase, subunit A 1.4 Membrane bioenergetics (electron transport chain and ATP synthase)                                                            | 7,1 | 76,4  | 106,2  | 3,3  | 2  | c       |
| PF#2836 | moxR ATPases MoxR family 1.4 Membrane bioenergetics (electron transport chain and ATP synthase)                                                                           | 5,4 | 37,4  | 112,2  | 13,7 | 3  | b       |
| PF#2838 | aceE dehydrogenase E1 component (2-oxo-acid dehydrogenase E1 subunit, homodimeric type) 2.1.2 Main glycolytic pathways                                                    | 5,5 | 102,1 | 267,7  | 6,4  | 5  | b       |
| PF#2843 | ll                                                                                                                                                                        | 5,2 | 48,0  | 1062,2 | 43,9 | 17 | a, b    |
| PF#2856 | lzn Zn dependant peptidase 3.10 Protein degradation                                                                                                                       | 5,0 | 48,5  | 328,5  | 22,0 | 7  | a       |
| PF#2869 | thrA hom Homoserine dehydrogenase 2.2 Metabolism of amino acids and related molecules                                                                                     | 5,4 | 46,5  | 450,1  | 22,2 | 8  | a, b    |
| PF#2891 | dpm dolichyl-phosphate beta-D-mannosyltransferase 1.1 Cell wall                                                                                                           | 5,3 | 31,7  | 399,6  | 31,2 | 6  | b, c    |
| PF#2905 | rpoZ DNA-directed RNA polymerase omega chain (RNAP omega subunit) (Transcriptase omega chain) (RNA polymerase omega subunit) 3.5.3 Transcription elongation               | 4,8 | 12,9  | 52,6   | 8,5  | 1  | c       |

|         |                                                                                                                                                                          |      |      |        |      |    |         |
|---------|--------------------------------------------------------------------------------------------------------------------------------------------------------------------------|------|------|--------|------|----|---------|
| PF#2912 | alaS Alanyl-tRNA synthetase (Alanine--tRNA ligase) (AlaRS) 3.7.2 Aminoacyl-tRNA synthetases                                                                              | 5,2  | 97,0 | 450,4  | 15,5 | 10 | a, b, c |
| PF#2931 | slh S-layer protein precursor 1.1 Cell wall                                                                                                                              | 4,9  | 57,3 | 98,0   | 1,7  | 2  | a, b    |
| PF#2932 | Hypothetical protein 6 Protein of unknown function, without similarity to other proteins                                                                                 | 4,7  | 19,8 | 649,1  | 69,1 | 11 | a       |
| PF#2945 | Zinc metallopeptidase 3.10 Protein degradation                                                                                                                           | 4,7  | 47,5 | 310,4  | 17,2 | 4  | b       |
| PF#2947 | fhs Formate--tetrahydrofolate ligase 2.1.1 Specific carbohydrate metabolic pathway                                                                                       | 5,2  | 59,1 | 732,5  | 36,7 | 16 | a, b    |
| PF#2955 | fusA Elongation factor G (EF-G) 3.7.4 Translation elongation                                                                                                             | 4,8  | 76,6 | 341,0  | 13,3 | 5  | b, c    |
| PF#2956 | rplC 50S ribosomal protein L3 3.7.1 Ribosomal proteins                                                                                                                   | 10,3 | 23,6 | 367,3  | 26,3 | 4  | c       |
| PF#2958 | mer Coenzyme F420-dependent N5,N10-methylene tetrahydromethanopterin reductase 1.4 Membrane bioenergetics (electron transport chain and ATP synthase)                    | 5,2  | 44,6 | 227,5  | 22,4 | 6  | b       |
| PF#2963 | foiD Methylenetetrahydrofolate dehydrogenase (Bifunctional protein) 2.5 Metabolism of coenzymes and prosthetic groups                                                    | 5,2  | 30,5 | 212,3  | 17,1 | 5  | b       |
| PF#2964 | mdh Malate dehydrogenase 2.1 Metabolism of carbohydrates and related molecules                                                                                           | 4,9  | 34,9 | 1211,1 | 60,4 | 19 | a, b, c |
| PF#2971 | protein of unknown function 5.2 Protein of unknown function similar to proteins from other organisms                                                                     | 4,8  | 34,9 | 108,2  | 5,6  | 1  | b, c    |
| PF#2975 | ABC transporter ATP-binding protein 1.2 Transport/binding proteins and lipoproteins                                                                                      | 4,9  | 62,5 | 103,7  | 4,6  | 2  | c       |
| PF#2979 | valS Valyl-tRNA synthetase (Valine--tRNA ligase) (ValRS) 3.7.2 Aminoacyl-tRNA synthetases                                                                                | 5,1  | 97,5 | 154,8  | 3,4  | 3  | b       |
| PF#3002 | fabF (fabB) 3-oxoacyl-[acyl-carrier-protein] synthase ( Beta-ketoacyl-ACP synthase) 2.4 Metabolism of lipids                                                             | 5,1  | 43,7 | 124,0  | 11,7 | 2  | b, c    |
| PF#3003 | fabH 3-oxoacyl-(Acyl-carrier-protein) synthase III 2.4 Metabolism of lipids                                                                                              | 4,8  | 31,7 | 82,7   | 3,3  | 1  | c       |
| PF#3004 | pf3004 Carboxylic ester hydrolase 2.4 Metabolism of lipids                                                                                                               | 5,2  | 32,9 | 230,0  | 10,7 | 2  | b, c    |
| PF#3019 | glgP Phosphorylase (alpha-glucan phosphorylase) 2.1 Metabolism of carbohydrates and related molecules                                                                    | 5,2  | 94,6 | 354,3  | 9,7  | 5  | b       |
| PF#3022 | pf3022 Homoserine O-acetyltransferase 2.2 Metabolism of amino acids and related molecules                                                                                | 5,8  | 44,3 | 197,0  | 12,8 | 4  | b       |
| PF#3034 | hisS Histidyl-tRNA synthetase (Histidine--tRNA ligase) (HisRS) 3.7.2 Aminoacyl-tRNA synthetases                                                                          | 5,3  | 48,9 | 220,7  | 11,5 | 4  | b       |
| PF#3039 | trpB Tryptophan synthase beta chain (TrpB) 2.2 Metabolism of amino acids and related molecules                                                                           | 5,3  | 44,7 | 54,7   | 2,9  | 1  | b       |
| PF#3040 | glnS Glutaminyl-tRNA synthetase 3.7.2 Aminoacyl-tRNA synthetases                                                                                                         | 5,2  | 64,2 | 219,9  | 9,1  | 4  | b       |
| PF#3042 | ABC transporter substrate-binding protein 1.2 Transport/binding proteins and lipoproteins                                                                                | 5,0  | 33,5 | 335,1  | 35,9 | 6  | a       |
| PF#3053 | ddlA D-alanine--D-alanine ligase (D-alanylalanine synthetase) 1.1 Cell wall                                                                                              | 4,9  | 40,4 | 258,6  | 16,5 | 5  | b, c    |
| PF#3055 | ilvE (bcaT) Branched-chain amino acid aminotransferase  2.2 Metabolism of amino acids and related molecules                                                              | 5,0  | 39,8 | 292,2  | 19,9 | 6  | b       |
| PF#3068 | pnpA Polynucleotide nucleotidyltransferase (Polynucleotide phosphorylase) (PNPase) (Guanosine pentaphosphate synthetase) 2.3 Metabolism of nucleotides and nucleic acids | 4,8  | 79,4 | 166,9  | 8,2  | 3  | b, c    |
| PF#3069 | glpK Glycerol kinase (ATP:glycerol 3-phosphotransferase) (Glycerokinase) (GK)  2.1.1 Specific carbohydrate metabolic pathway                                             | 4,7  | 55,7 | 329,6  | 14,2 | 5  | b       |
| PF#3074 | rpsA 30S ribosomal protein S1 3.7.1 Ribosomal proteins                                                                                                                   | 4,6  | 53,6 | 754,1  | 40,5 | 15 | a, b, c |
| PF#3082 | ll                                                                                                                                                                       | 8,9  | 78,6 | 588,7  | 16,1 | 8  | a       |
| PF#3083 | aroH Phospho-2-dehydro-3-deoxyheptonate aldolase 2.2 Metabolism of amino acids and related molecules                                                                     | 5,2  | 51,1 | 336,0  | 13,9 | 5  | b       |
| PF#3085 | sucB Dihydroliipoamide acyltransferase, E2 component of 2-oxoacid dehydrogenase complex 2.1 Metabolism of carbohydrates and related molecules                            | 4,6  | 59,6 | 207,5  | 9,5  | 3  | b, c    |
| PF#3088 | dapA Dihydrodipicolinate synthase 2.2 Metabolism of amino acids and related molecules                                                                                    | 5,0  | 29,4 | 339,5  | 31,0 | 6  | a, b, c |
| PF#3090 | glgC Glucose-1-phosphate adenylyltransferase (ADP-glucose synthase) (ADP-glucose pyrophosphorylase) (ADP-Glc PPase) 2.1.1 Specific carbohydrate metabolic pathway        | 4,9  | 45,0 | 157,9  | 10,8 | 3  | b       |
| PF#3106 | slpA surface layer protein A (S-layer protein A) 1.1 Cell wall                                                                                                           | 4,7  | 57,0 | 2593,7 | 67,8 | 39 | a, b    |
| PF#3107 | glyA Glycine hydroxymethyltransferase precursor 2.2 Metabolism of amino acids and related molecules                                                                      | 5,3  | 51,9 | 1187,2 | 64,3 | 22 | a       |

|         |                                                                                                                                                           |      |       |        |      |    |         |
|---------|-----------------------------------------------------------------------------------------------------------------------------------------------------------|------|-------|--------|------|----|---------|
| PF#3109 | hemL Glutamate-1-semialdehyde 2,1-aminomutase (GSA) (Glutamate-1-semialdehyde aminotransferase)(GSA-AT) 2.5 Metabolism of coenzymes and prosthetic groups | 5,1  | 45,9  | 332,8  | 14,3 | 4  | b       |
| PF#3122 | mmsB 3-hydroxyisobutyrate dehydrogenase related beta-hydroxyacid dehydrogenase 2.4 Metabolism of lipids                                                   | 4,6  | 28,1  | 268,1  | 22,6 | 4  | b       |
| PF#3134 | nirA2 sir2 Sulfite reductase [ferredoxin] 2.7 Metabolism of sulfur                                                                                        | 5,9  | 68,0  | 236,7  | 13,2 | 5  | b, c    |
| PF#3145 | hsp20_1 Heat shock protein 20 1 (20 kDa chaperone 1) 3.9 Protein folding                                                                                  | 4,7  | 17,2  | 448,4  | 62,3 | 8  | a, b, c |
| PF#3161 | ll                                                                                                                                                        | 4,2  | 16,5  | 88,9   | 7,5  | 1  | a       |
| PF#3174 | IspA large surface protein A 1.1 Cell wall                                                                                                                | 4,8  | 137,3 | 2461,5 | 48,1 | 37 | a, b    |
| PF#3204 | nifJ Pyruvate-flavodoxin oxidoreductase 1.4 Membrane bioenergetics (electron transport chain and ATP synthase)                                            | 5,2  | 136,6 | 2636,5 | 54,3 | 47 | a, b, c |
| PF#3205 | Idi hydroorotate dehydrogenase 2.3 Metabolism of nucleotides and nucleic acids                                                                            | 4,8  | 40,7  | 191,5  | 13,8 | 3  | b, c    |
| PF#3211 | none Protein of unknown function 5.2 Protein of unknown function similar to proteins from other organisms                                                 | 6,4  | 25,5  | 141,7  | 13,9 | 4  | a       |
| PF#3216 | rpsF 30S ribosomal protein S6 3.7.1 Ribosomal proteins                                                                                                    | 5,4  | 12,0  | 249,4  | 43,3 | 4  | b, c    |
| PF#3271 | fumC Fumarate hydratase, class-II 2.1.3 TCA cycle                                                                                                         | 5,3  | 51,1  | 2175,1 | 74,9 | 38 | a, b, c |
| PF#3341 | dhaK DhaK PTS-dependent dihydroxyacetone kinase, dihydroxyacetone-binding subunit  2.1.1 Specific carbohydrate metabolic pathway                          | 4,7  | 34,7  | 163,0  | 11,2 | 3  | b       |
| PF#3363 | Arth_4141 FAD linked oxidase domain protein 1.4 Membrane bioenergetics (electron transport chain and ATP synthase)                                        | 5,7  | 100,5 | 214,0  | 5,4  | 4  | b       |
| PF#3403 | ppgK Polyphosphate glucokinase 2.1.2 Main glycolytic pathways                                                                                             | 6,0  | 27,4  | 134,7  | 15,7 | 3  | b       |
| PF#3408 | rpsE 30S ribosomal protein S5 3.7.1 Ribosomal proteins                                                                                                    | 10,0 | 24,0  | 192,8  | 18,1 | 3  | c       |
| PF#3411 | lysA Diaminopimelate decarboxylase (DAP decarboxylase) 2.2 Metabolism of amino acids and related molecules                                                | 5,9  | 59,0  | 336,7  | 14,5 | 7  | a       |
| PF#3412 | Hypothetical protein 6 Protein of unknown function, without similarity to other proteins                                                                  | 6,5  | 30,9  | 360,4  | 20,2 | 5  | a       |
| PF#3415 | hisC Histidinol-phosphate aminotransferase (Imidazole acetol- phosphate transaminase) 2.2 Metabolism of amino acids and related molecules                 | 6,0  | 44,4  | 250,5  | 17,4 | 6  | b       |
| PF#3426 | ansA L-asparaginase II 2.2 Metabolism of amino acids and related molecules                                                                                | 4,7  | 37,3  | 208,8  | 16,3 | 4  | b       |
| PF#3427 | FimP Type-1 fimbrial major subunit precursor 1.1 Cell wall                                                                                                | 4,7  | 36,9  | 110,8  | 10,3 | 2  | a       |
