# Supplementary material
Source: publisher figshare collection journal article supplement (https://plos.figshare.com/articles/dataset/_/142505)
Supplement: Supplementary file [file 1]

| locus_tag    | product                                                                                                                     | EC number | function                                              | gene name          |
|--------------|-----------------------------------------------------------------------------------------------------------------------------|-----------|-------------------------------------------------------|--------------------|
| PFREUD_02720 | NUDIX hydrolase                                                                                                             |           | 4.1 Adaptation to atypical conditions                 |                    |
| PFREUD_07140 | NUDIX hydrolase                                                                                                             |           | 4.1 Adaptation to atypical conditions                 |                    |
| PFREUD_09230 | NUDIX hydrolase                                                                                                             |           | 4.1 Adaptation to atypical conditions                 |                    |
| PFREUD_10620 | NUDIX hydrolase                                                                                                             |           | 4.1 Adaptation to atypical conditions                 |                    |
| PFREUD_17200 | NUDIX hydrolase                                                                                                             |           | 4.1 Adaptation to atypical conditions                 |                    |
| PFREUD_18300 | NUDIX hydrolase                                                                                                             |           | 4.1 Adaptation to atypical conditions                 |                    |
| PFREUD_19450 | NUDIX hydrolase                                                                                                             |           | 4.1 Adaptation to atypical conditions                 | <i>pfp (pfk)</i>   |
| PFREUD_19940 | NUDIX hydrolase                                                                                                             |           | 4.1 Adaptation to atypical conditions                 | <i>cobU</i>        |
| PFREUD_09830 | NUDIX hydrolase                                                                                                             |           | 4.1 Adaptation to atypical conditions                 | <i>phk</i>         |
| PFREUD_12230 | CobU Bifunctional cobalamin biosynthesis pyrophosphate enzyme                                                               | 2.7.7.62  | 2.5 Metabolism of coenzymes and prosthetic groups     | <i>ppgK</i>        |
| PFREUD_15680 | Geranylgeranyl pyrophosphate synthase                                                                                       | 2.5.1.29  | 2.5 Metabolism of coenzyme and prosthetic group       |                    |
| PFREUD_17010 | Undecaprenyl pyrophosphate synthase (di-trans,poly-cis-decaprenylcistransferase)                                            | 2.5.1.31  | 2.4 Metabolism of lipids                              |                    |
| PFREUD_14200 | Undecaprenyl-diphosphatase (Undecaprenyl pyrophosphate phosphatase) (Bacitracin resistance protein)                         | 3.6.1.27  | 1.1 Cell wall                                         |                    |
| PFREUD_12930 | Phosphoketolase pyrophosphate                                                                                               | 4.1.2.9   | 2.1.2 Main glycolytic pathways                        | <i>ppnK</i>        |
| PFREUD_02600 | Polyphosphate glucokinase                                                                                                   | 2.7.1.63  | 2.1.2 Main glycolytic pathways                        | <i>uppP (BacA)</i> |
| PFREUD_19930 | Polyphosphate kinase                                                                                                        | 2.7.4.1   | 2.6 Metabolism of phosphate                           |                    |
| PFREUD_13670 | Probable inorganic polyphosphate/ATP-NAD kinase (Poly(P)/ATP NAD kinase)                                                    | 2.7.1.23  | 2.6 Metabolism of phosphate                           | <i>uppS</i>        |
| PFREUD_12040 | pyrophosphate phosphofructokinase                                                                                           | 2.7.1.90  | 2.1 Metabolism of carbohydrates and related molecules |                    |
| PFREUD_22260 | ribose-phosphate pyrophosphokinase (RPPK) (Phosphoribosyl pyrophosphate synthetase) (P-Rib-PP synthetase) (PRPP synthetase) | 2.7.6.1   | 2.3 Metabolism of nucleotides and nucleic acids       |                    |
| PFREUD_05340 | Thiamine pyrophosphate (TPP family)                                                                                         |           | 2.6 Metabolism of phosphate                           |                    |
| PFREUD_04430 | Thiamine pyrophosphate enzyme                                                                                               |           | 2.6 Metabolism of phosphate                           | <i>ppk</i>         |
