# Supplementary material
Source: publisher figshare collection journal article supplement (https://plos.figshare.com/articles/dataset/_/142505)
Supplement: Supplementary file [file 1]

Table S5 : Results of test of vitamin requirements by *P. freudenreichii* CIRM-BIA1<sup>T</sup>

| Atmosphere     | Media <sup>a</sup>                      | maximal           |                                  |          |                     |
|----------------|-----------------------------------------|-------------------|----------------------------------|----------|---------------------|
|                |                                         | OD <sub>650</sub> | % OD <sub>ctl</sub> <sup>a</sup> | Time (d) | CFU/mL <sup>b</sup> |
| Anaerobic      | Control (9 vitamins) <sup>c</sup>       | 1.2               | 100                              | 6.8      | 8.7                 |
|                | without vit. B6                         | 1.1               | 95                               | 6.8      | 8.8                 |
|                | without vit. PP                         | 1.1               | 94                               | 6.8      | 8.8                 |
|                | without p-aminobenzoic acid and vit. B9 | 1.1               | 97                               | 6.8      | 8.8                 |
|                | without vit. B2                         | 1.1               | 95                               | 8.8      | 8.9                 |
|                | without vit. B12                        | 1.0               | 84                               | 9.5      | 8.6                 |
|                | without vit. B1                         | 0.6               | 36                               | 7.1      | nd <sup>d</sup>     |
|                | without vit. B5                         | 0.2               | 6                                | > 12     | nd                  |
|                | without vit. H                          | 0.2               | 6                                | > 12     | nd                  |
| Semi-anaerobic | Control (9 vitamins)                    | 1.5               | 100                              | 9.0      | 8.7                 |
|                | without vit. B6                         | 1.4               | 95                               | 8.3      | 8.7                 |
|                | without vit. PP                         | 1.5               | 103                              | 8.3      | 8.8                 |
|                | without p-aminobenzoic acid and vit. B9 | 1.3               | 92                               | 9.5      | 8.7                 |
|                | without vit. B2                         | 1.4               | 95                               | 9.3      | 8.8                 |
|                | without vit. B12                        | 1.4               | 98                               | 8.8      | 8.6                 |
|                | without vit. B1                         | 1.1               | 19                               | 9.0      | nd                  |
|                | without vit. B5                         | 0.1               | 2                                | > 12     | nd                  |
|                | without vit. H                          | 0.1               | 2                                | > 12     | nd                  |

<sup>a</sup> % OD<sub>ctl</sub>, OD<sub>650</sub> of the medium tested / OD<sub>650</sub> in the control medium x 100

<sup>b</sup> CFU, colony-forming units

<sup>c</sup> the control medium contained 9 vitamins: pyridoxal phosphate (B6), nicotinic acid (PP), pantothenate(B5), thiamine(B1), riboflavin(B2), p-aminobenzoic acid, folic acid (B9), biotine (H), and vitamin B12)

<sup>d</sup> nd, not determined
